1 **CRISPRi/a reveal signalling pathways controlling heat adaptation**

2 Cosimo Jann<sup>1,2,\*</sup>, Andreas Johansson<sup>1</sup>, Justin D. Smith<sup>3,4</sup>, Leopold Parts<sup>5,6,\*</sup>, Lars M. Steinmetz<sup>1,3,4,\*</sup>

3

4 <sup>1</sup>European Molecular Biology Laboratory (EMBL), Genome Biology Unit, Heidelberg, Germany.

5 <sup>2</sup>ETH Zurich, Department of Biology, Institute of Biochemistry, Zurich, Switzerland.

6 <sup>3</sup>Department of Genetics, Stanford University School of Medicine, Stanford, California, USA.

7 <sup>4</sup>Stanford Genome Technology Center, Stanford University, Palo Alto, California, USA.

8 <sup>5</sup>Wellcome Sanger Institute, Hinxton, UK.

9 <sup>6</sup>Department of Computer Science, University of Tartu, Tartu, Estonia.

10 \*Correspondence to C.J. (cosimo.jann@embl.de) or L.P. (leopold.parts@sanger.ac.uk) or L.M.S.  
11 (lars.steinmetz@embl.de).

12

13 **Abstract**

14 Heat stress causes proteins to unfold and lose their function, jeopardizing essential cellular processes.  
15 To protect against heat and proteotoxic stress, cells mount a dedicated stress-protective programme,  
16 the so-called heat shock response (HSR). Our understanding of the mechanisms that regulate the HSR  
17 and their contributions to heat resistance and growth is incomplete. Here we employ CRISPRi/a to  
18 down- or upregulate protein kinases and transcription factors in *S. cerevisiae*. We measure gene  
19 functions by quantifying perturbation effects on HSR activity, thermotolerance, and cellular fitness at  
20 23, 30 and 38°C. The integration of these phenotypes allowed us to identify core signalling pathways  
21 of heat adaptation and reveal novel functions for the high osmolarity glycerol, unfolded protein  
22 response and protein kinase A pathways in adjusting both thermotolerance and chaperone expression.  
23 We further provide evidence for unknown cross-talk of the HSR with the cell cycle-dependent kinase  
24 Cdc28, the primary regulator of cell cycle progression. Finally, we show that CRISPRi efficiency is  
25 temperature-dependent and that different phenotypes vary in their sensitivity to knock-down. In  
26 summary, our study quantifies regulatory gene functions in different aspects of heat adaptation and  
27 advances our understanding of how eukaryotic cells counteract proteotoxic and other heat-caused  
28 damage.

29

30 *Keywords: CRISPRi/a, CRISPR/dCas9 screen, heat shock response, thermotolerance, Hsf1, HOG pathway,*  
31 *PKA signalling.*

32

33

## 34 Introduction

35 When exposed to high temperature, cells need to resist the proteotoxicity due to protein misfolding  
36 and aggregation<sup>1,2</sup> and other heat-caused damage<sup>3</sup>. They do so by eliciting a series of stress-protective  
37 events, referred to as the heat shock response (HSR)<sup>4</sup>. The HSR is highly conserved across eukaryotes  
38 and characterized by the fierce production of heat shock proteins (HSPs) which mostly function in  
39 maintaining protein homeostasis<sup>5,6</sup>. Dysregulation of the HSR results in altered chaperone capacity  
40 and is linked to neurodegenerative diseases<sup>7,8</sup> and aging<sup>9</sup> where decreased HSR activity aggravates  
41 proteotoxicity. Cancers also hijack and increase HSR activity to cope with their proteotoxic burden<sup>10</sup>.  
42 In the last two decades, heat-induced changes to the transcriptome and proteome have been well  
43 characterized<sup>11-17</sup>. In budding yeast, a shift from 30 to 37°C causes around a thousand genes to change  
44 transcription<sup>11,17</sup>, while exposure to 42°C results in expression changes for more than 50% of the yeast  
45 genome (~3100 genes), with higher magnitude and longer upkeep compared to 37°C<sup>17</sup>. Much less is  
46 known about the mechanisms that enable regulation of this response which is essential to safeguard  
47 cellular survival.

48 Heat shock factor 1 (Hsf1) is considered the master HSR regulator, in yeast acting together with the  
49 general stress response factors Msn2 and Msn4<sup>18,19</sup>. Hsf1 is regulated through titration by  
50 chaperones<sup>20-23</sup> and hyperphosphorylation<sup>24,25</sup>. Dissection of the Hsf1-driven HSR in yeast<sup>26</sup> and  
51 human cells<sup>27</sup> revealed new mechanisms controlling Hsf1. However, recent studies demonstrate that  
52 the HSR remains largely unchanged when Hsf1 is absent in yeast and mammalian cells, and mainly  
53 driven by other transcriptional regulators<sup>15,28</sup>. In addition, even for Hsf1, Msn2 and Msn4, the most  
54 prominent transcription factors (TFs) of the yeast HSR, the protein kinases (PKs) mediating their heat-  
55 induced hyperphosphorylation and activation remain elusive<sup>29</sup>. Individual TFs are likely controlled by  
56 an interplay of signalling pathways that, apart from transcription<sup>15</sup>, may also affect mRNA  
57 localization<sup>30</sup>, stability<sup>31</sup> and translation<sup>32</sup>.

58 HSR overlaps with oxidative and general stress responses<sup>11,19</sup> which trigger cell cycle arrest and the  
59 cell wall integrity (CWI) pathway<sup>33,34</sup>. The HSR also inhibits target of rapamycin (TOR) signalling<sup>35</sup> and  
60 is itself repressed by protein kinase A (PKA)<sup>36,37</sup>. High temperature further activates the high  
61 osmolarity glycerol (HOG) pathway, although its role is unknown<sup>38-40</sup>. A comprehensive  
62 understanding of how signalling programmes integrate to regulate the HSR is missing. In addition, it  
63 is unclear which molecular branches of the HSR contribute to cellular protection, given that the bulk  
64 of heat-induced genes<sup>17,28</sup> is dispensable for tolerance to both acute and anticipated stress<sup>41-43</sup>.

65 Here we dissect HSR regulation by CRISPR interference and activation (CRISPRi/a) systems that  
66 employ a catalytically inactive Cas9 nuclease fused to transcriptional repression or activation  
67 domains<sup>44,45</sup>. Only a handful of studies reported the use of these technologies for functional genomic  
68 screens in *S. cerevisiae*, mostly assaying effects on growth<sup>46-50</sup>. We employ inducible CRISPRi/a<sup>46,51</sup> to  
69 modulate the abundance of protein kinases (PKs) and transcription factors (TFs), key regulators of  
70 almost every cellular pathway and trait, and screen for gene functions in cellular fitness at

71 temperatures 23°C, 30°C and 38°C, HSR activity and thermotolerance. We discover a handful of genes  
72 capable of tuning thermotolerance by altering chaperone expression, including principal regulators of  
73 the HSR, the unfolded protein response (UPR), as well as the HOG and PKA pathways. We further find  
74 that CRISPRi effect size is temperature-dependent and that diverse traits are differentially sensitive to  
75 knock-down. Altogether, our study reveals the HSR as a complex programme, regulated by multiple  
76 molecular pathways and coupled with diverse cellular mechanisms to confer a rapid and precisely  
77 tuned adaptation to heat.

78

## 79 **Results**

### 80 ***CRISPRi/a efficiently modulate gene expression***

81 We first validated the performance of the employed perturbation and reporter systems. To confirm  
82 CRISPRi effects on growth, we repressed the essential *HSF1* gene. As expected, this resulted in  
83 decreased growth rate, with varied effect size for three gRNAs differing in target sequence and distance  
84 to the transcription start site (TSS) (Fig. 1a and b). Effects were specifically observed in the presence  
85 of the gRNA-inducing compound anhydrotetracycline (ATc) (Supplementary Fig. S1).

86 We quantify HSR activity with a heat-responsive reporter based on the truncated promoter of the *SSA1*  
87 *HSP70* gene<sup>52,53</sup> driving expression of an ultra-fast maturing GFP<sup>54</sup>. We validated our CRISPRi/a  
88 systems by targeting this promoter, achieving efficient knock-down and overexpression of Hsp70  
89 protein, respectively (Fig. 1c). The ATc-induced CRISPRa strain had fivefold increased reporter signal  
90 already before heat shock (t=0), as expected for strong activation (dark green curve in Fig. 1c).  
91 Interestingly, heat exposure (t>0) resulted in ~30 min delayed *SSA1* expression compared to the non-  
92 induced CRISPRa strain. The *SSA1* promoter was thus not immediately induced if Hsp70 protein levels  
93 were already elevated, in line with its ability to inhibit Hsf1<sup>20,25</sup>.

94 As a proof of concept for using the HSR reporter for functional genomics, we tested its responsiveness  
95 to Hsf1. Repression of Hsf1 decreased Ssa1 protein levels in heat and non-stress conditions (Fig. 1d),  
96 as expected from *SSA1* mRNA changes after Hsf1 depletion<sup>28</sup> and chromatin-immunoprecipitation  
97 (ChIP) of the *SSA1* promoter together with Hsf1 protein<sup>55</sup>. The GFP-based reporter is selectable by  
98 Fluorescence-Automated Cell Sorting (FACS) and CRISPRi effects were inherited over at least 20  
99 generations (Fig. 1e), indicating excellent suitability for genetic screens.

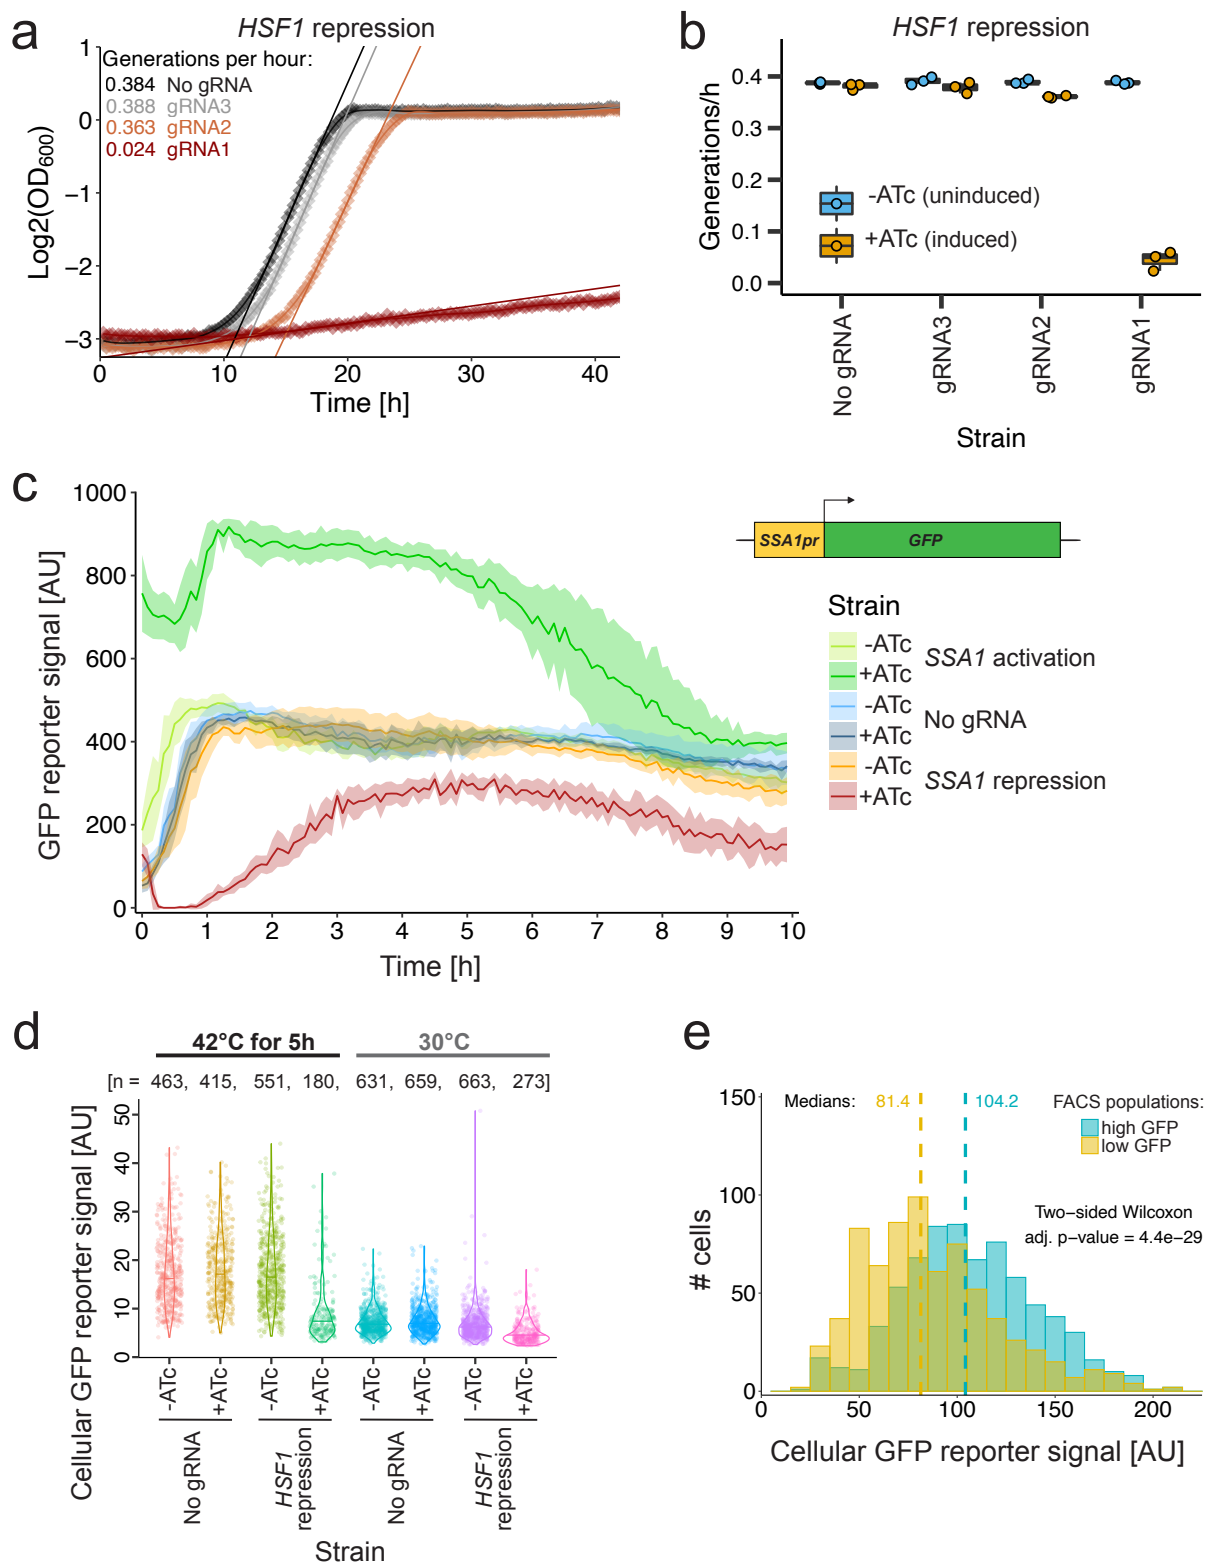

100

101 **Figure 1. Evaluation of CRISPRi/a effects and the HSR reporter.** **a**, Growth curves for repression of  
 102 *HSF1* with three different gRNAs. The optical density at 600 nm (OD600) of strains grown with ATc to  
 103 induce CRISPRi was measured over time. Lines denote linear fits. **b**, Generation times of different *HSF1*  
 104 CRISPRi strains (x-axis), measured in n=3 replicate well cultures. **c**, Normalized GFP signal of *SSA1*  
 105 CRISPRa (act) and CRISPRi (rep) strains over time. Cultures were grown at 30°C, calibrated at

106 OD<sub>600</sub>=0.3 and exposed to 40°C throughout the experiment. The y-axis denotes GFP intensity  
107 normalized by OD<sub>600</sub>. Lines denote means and ribbons denote standard deviations of n=6 replicate  
108 well cultures, respectively. The chromosomally inserted HSR reporter is depicted as inlay. **d**, Cellular  
109 reporter signal of CRISPRi strains at 30°C and exposed to 42°C for 5h. Dots denote single cells imaged  
110 by fluorescence microscopy. Horizontal lines mark medians. **e**, Cellular GFP intensity of CRISPRi  
111 strains (merged data for TF and PK libraries) sorted for high or low cellular GFP intensity after heat  
112 shock, regrown for more than 20 generations, and imaged by microscopy. The cellular GFP intensity  
113 (x-axis) is shown for bins of size 10. Dashed lines denote medians.

114

### 115 ***Gene dosage effects on cellular fitness***

116 We first characterised CRISPRi effects on fitness (Fig. 2a). We repressed sets of either 129 protein  
117 kinases<sup>56</sup> or 161 transcription factors<sup>57</sup> with up to six gRNAs per gene (Supplementary Fig. S2). Out of  
118 1573 gRNAs in both libraries, 271 were significantly depleted (two-fold depletion, FDR<0.05) after  
119 two days of competitive growth at 30°C (Supplementary Fig. S3). Approximately 40% of gRNAs were  
120 effective (Fig. 2b), based on the dropout of essential genes defined as non-viable deletions according  
121 to the *Saccharomyces* Genome Database (SGD)<sup>58</sup>. CRISPRi efficiency depends on the GC content and  
122 secondary structure of gRNAs (Supplementary Fig. S4), and the chromatin accessibility at the targeted  
123 genomic locus (Supplementary Fig. S5) which supports and complements previous findings<sup>46,47</sup>. Based  
124 on the distance between TSS and gRNA target locus, the optimal range is between TSS-150 to TSS+25  
125 nucleotides, with minor variation between target strands (Supplementary Fig. S4b).

126

127 Cellular fitness decreased upon repression of 68 genes (Fig. 2c, Supplementary Tab. 1). These were  
128 enriched for essential functions (34% compared to 12% in the background) with roles in ribosome  
129 biogenesis, cell cycle and chromosome segregation (Supplementary Fig. S6). Out of the 34 targeted  
130 essential genes, 31 had at least one effective gRNA, and 23 were depleted with two or more supporting  
131 gRNAs (Supplementary Fig. S7). In general, fitness effects correlated with knock-out (KO) screens,  
132 despite differences in assay conditions and readouts (Supplementary Fig. S8), and outperformed  
133 heterozygous deletions in detecting gene essentiality (Supplementary Fig. S9). We measured novel  
134 fitness-modulatory roles for eight open reading frames (ORFs) (*CAD1*, *FPK1*, *IKS1*, *NHP6A*, *RSC30*, *SCH9*,  
135 *TEA1*, *TPK2*) and two ambiguous loci where multiple TSS were potentially targeted (*FUS3/PEP1*,  
136 *MMO1/PHD1*).

137 To validate screen performance, we selected ten ORFs for further characterization; six known to affect  
138 growth and four measured with new functions. We observed high correlation between screen fold  
139 changes and individually determined growth rates (Spearman  $r=0.77$ ; Supplementary Fig. S10), and  
140 half-maximal OD intervals ( $t_{OD0.5}$ ) which additionally report on lag time (Spearman  $r=-0.87$ ; Fig. 2d).  
141 This follow-up confirmed novel roles in fitness regulation for all four genes included (*FPK1*, *RSC30*,  
142 *TEA1*, *TPK2*).

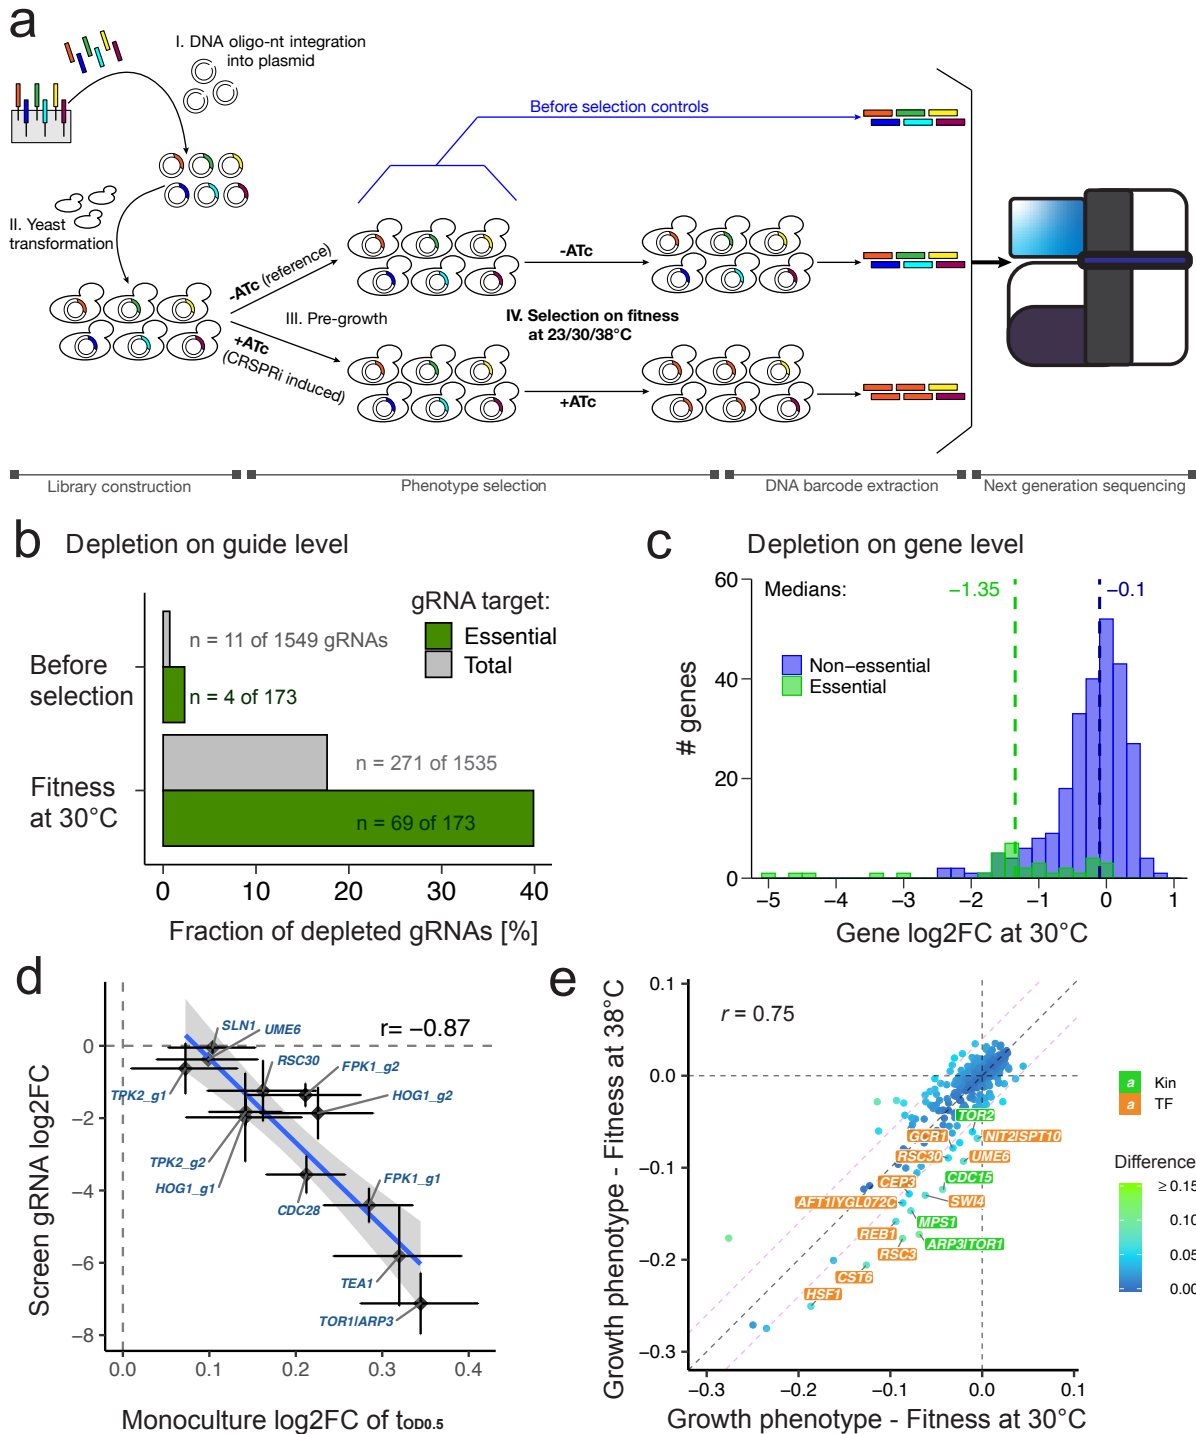

143

144 **Figure 2. CRISPRi effects are reproducible, capture positive controls and novel fitness**

145 **modulators.** **a**, Experimental set-up for competitive growth screens. Briefly, a computationally

146 designed oligonucleotide library was cloned into plasmids and transformed into yeast. CRISPRi

147 induced (+ATc) and reference yeast cultures (-ATc) were then profiled for fitness, followed by plasmid

148 DNA extraction and gRNA barcodes sequencing. **b**, Frequency of CRISPRi strain dropout from

149 populations before selection (after 10 h pre-growth, see Methods) and after two days selection at 30°C.

150 Fractions of gRNAs with  $\log_2FC \leq -1$  and  $FDR < 0.05$  are shown for total and essential genes (merged

151 for PK and TF library data). Numbers denote displayed ratios. **c**, Depletion of essential (green) and

152 non-essential genes (blue) for fitness at 30°C. Histogram bins have size 0.2 and dashed lines denote  
153 medians. Gene log<sub>2</sub>FCs represent mean gRNA log<sub>2</sub>FCs per gene. **d**, Comparison of screen gRNA log<sub>2</sub>FC  
154 with monoculture log<sub>2</sub>-scale effects on t<sub>OD0.5</sub> (time until cultures reach half-maximal OD) which reports  
155 on growth rate and lag time. Error bars denote standard deviations of n=3 well cultures (x-axis) and  
156 n=2 replicates for the fitness at 30°C screen (y-axis). Spearman correlation is shown. Repressed genes  
157 are labelled. If multiple gRNAs were used, these are included in labels with g[1-9]. Dashed grey lines  
158 are intercepts marking a fold change of 0. The linear model fit was generated with the R ggplot2  
159 function geom\_smooth, using default parameters and method="lm". Hsf1 was not included since  
160 maximum OD values are not meaningful for severe growth defects (see gRNA1 in Fig. 1a). **e**, CRISPRi  
161 effects on cellular fitness at 30 versus 38°C. Dots denote generation-normalized gene log<sub>2</sub>FCs coloured  
162 by difference and Spearman correlation is shown. Genes with heat-sensitive phenotypes were labelled  
163 in green (PKs) and orange boxes (TFs). Dashed purple lines mark diagonals indicating difference  
164 thresholds at -/+ 0.04. Dashed grey lines are intercepts marking a fold change of 0 and the diagonal.  
165

### 166 ***Genetic requirements for growth at high temperature***

167 Having validated our assay at 30°C, we further screened for fitness effects at 23 and 38°C, detecting 18  
168 and 30 depleted genes, respectively (Supplementary Tab. 1). Effect size and statistical power were  
169 reduced compared to the 30°C screen due to less generations of selection, considering that doubling  
170 time was lowered by ~60% at 23°C and by ~30% at 38°C (Supplementary Fig. S11-12). Generation-  
171 normalized fold changes correlated well between temperatures, demonstrating high reproducibility  
172 not only for read counts (Supplementary Fig. S13) but also for CRISPRi effects (Supplementary Fig.  
173 S14). We detected 15 genes causing heat sensitivity upon repression, derived from reduced fitness at  
174 38 compared to 30°C (Fig. 2e), nine of which were known, such as Hsf1 and Swi4 which control HSR  
175 transcription<sup>59,60</sup>, Reb1 which enhances Hsf1 transactivation<sup>61</sup>, Ume6 which promotes Msn2/4-  
176 dependent transcription as part of the Rpd3L histone deacetylation complex<sup>62</sup>, and Cst6 with a yet  
177 unknown but predicted role in the HSR<sup>63</sup>. Quantification of mRNA and gRNA levels in Hsf1 and Ume6  
178 CRISPRi strains over time and temperatures confirmed efficient repression in all conditions, showing  
179 that heat sensitivity is not simply due to stronger repression at higher temperature (Supplementary  
180 Fig. S15). Novel roles in heat sensitivity were detected for Cep3, Gcr1, Tor2 and Rsc30. Supporting this,  
181 Gcr1 controls the expression of glycolysis genes<sup>64</sup> and Tor2 regulates cytoskeleton organization<sup>65</sup>, both  
182 important for thermal adaptation<sup>3</sup>. Rsc30 is part of the RSC complex which translocates from ORFs to  
183 promoters in heat to facilitate nucleosome dissociation<sup>66</sup> and Hsf1-mediated transcription<sup>61</sup>, akin to  
184 the known hit Rsc3 (Fig. 2e).

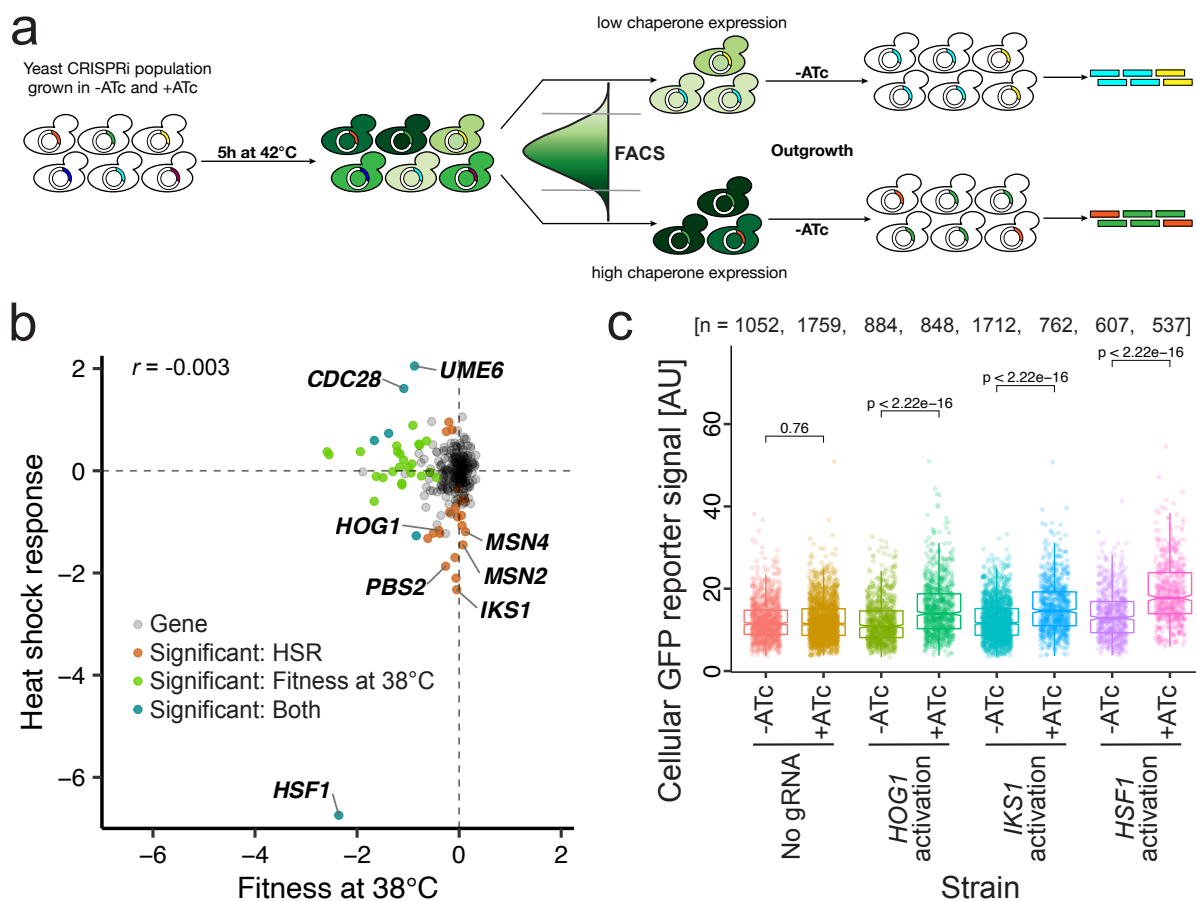

185

186 **Figure 3. Modulators of HSR activity.** **a**, Schematic of the reporter-based HSR screen. After heat  
 187 exposure, cells with extremely high and low GFP intensity were collected by FACS and identified  
 188 through barcode sequencing. **b**, Comparison of gene log<sub>2</sub> fold changes for cellular fitness at 38°C  
 189 versus HSR with Spearman correlation. Dots denote genes (n=290), coloured by screen effects as  
 190 indicated in figure legend. Selected HSR modulators are labelled. **c**, Cellular *SSA1pr-GFP* reporter  
 191 intensity (y-axis) of individual CRISPRa strains cultured with or without ATc (x-axis) after 5h exposure  
 192 to 42°C, and imaged with fluorescence microscopy. Dots denote single cells. Used gRNAs are *Hog1\_g1*,  
 193 *Iks1\_g5*, *Hsf1\_g1*. Two-sided Wilcoxon adjusted p-values are depicted for tests between samples.

194

### 195 **Modulators of the heat shock response**

196 Most transcripts induced during heat shock appear to not serve protective functions and it is therefore  
 197 debated if they compensate for loss-of-function effects due to protein instability<sup>41</sup>. Combining  
 198 published RNAseq time course with thermal proteome profiling data, we found that heat-induced  
 199 transcripts encode proteins with higher than average thermal stability, while proteins with low  
 200 stability are down-regulated (Supplementary Fig. S16). This suggests that the HSR is a purposeful  
 201 programme to enhance heat resistance rather than overproducing proteins that go astray.

202 To identify components controlling the HSR pathway, we established a flow cytometry assay (Fig. 3a)  
 203 based on the *Hsp70* reporter (introduced in Fig. 1c). This allowed us to measure impacts on chaperone  
 204 expression independent of fitness effects (Fig. 3b & Supplementary Fig. S11). Out of the 290 TFs and



205 PKs, we found twenty to decrease and seven to increase HSR activity upon repression, implying  
206 functions in promoting and inhibiting the HSR, respectively (Supplementary Tab. 1). CRISPRi effects  
207 on the Hsp70 promoter cannot be fully explained by previous screens with artificial promoters based  
208 on either heat shock elements (HSEs) recognized by Hsf1 or stress response elements bound by  
209 Msn2/4, using deletion mutants and a one hour heat shock at 37°C (Supplementary Fig. S17)<sup>26</sup>. Most  
210 of our hits were thus not known to tune chaperone expression during the HSR, although we found that  
211 individual roles were supported by studies that probed 35 or 68 gene deletions with an *HSP12-GFP*  
212 reporter gene<sup>67,68</sup>.

213 Hsf1 was the most potent HSR activator (Fig. 3b), in agreement with single cell microscopy results (Fig.  
214 1d). Additionally, Msn2 and Msn4 were measured as strong HSR stimulators, further validating the  
215 experimental setup (Fig. 3b). The two regulators of the environmental stress response are redundant  
216 for growth and thermotolerance, as discovered by Martínez-Pastor et al. (1996)<sup>69</sup> and confirmed by  
217 our study. In contrast, repression of either factor decreased Hsp70 expression which demonstrates  
218 their non-redundant roles in stimulating transcription as part of the HSR<sup>11</sup>. Notably, the second  
219 strongest HSR stimulator in the panel was Iks1, a putative kinase of unknown function which is  
220 transcriptionally induced at 37°C<sup>70</sup> and during proteotoxic stress<sup>71</sup> (Fig. 3b). We measured further  
221 genes that promote HSR activity, derived from decreased reporter signal upon repression, that encode  
222 chromatin remodellers (Rsc30, Nhp6A), activators of the plasma membrane ATPase (Ptk2, Hrk1)  
223 stress-related kinases (Mck1, Rim15, Yak1), and surprisingly also central components of the UPR  
224 (Ire1), the high osmolarity glycerol (HOG) pathways (Hog1, Pbs2, Rck2) and the protein kinase A (PKA)  
225 subunit Tpk2. Additionally, we determined found four kinases (Cdc28, Hrr25, Mps1, Sch9) and three  
226 TFs (Rim101, Sok2, Ume6) with roles in alleviating HSR activity. We confirmed that Cdc28 counteracts  
227 the HSR by FACS (Supplementary Fig. S18a) which further agrees with screen measurements for its  
228 regulators (Supplementary Fig. S18b). All three HSR-antagonizing TFs act as transcriptional  
229 repressors<sup>72-74</sup>, in line with their inhibiting roles.

230 Microscopy follow-ups confirmed screen results for the repression of Hog1, Iks1 and Ume6  
231 (Supplementary Fig. 19). In addition, we show that CRISPRi screen phenotypes can be reversed using  
232 CRISPRa strains for Hog1, Iks1 and Hsf1 by CRISPRa (Fig. 3e). HSR-stimulating kinases, such as Iks1,  
233 Hog1, Rim15 and Yak1 potentially activate a potent TF. Rim15 and Yak1 phosphorylate both Hsf1 and  
234 Msn2 upon glucose starvation<sup>75-77</sup> and our results suggest these roles also as part of the HSR. The  
235 opposite phenotypes measured for Sch9 CRISPRi strains further agree with the role of Sch9 in  
236 inhibiting Rim15<sup>78</sup>, Yak1<sup>79</sup> and Hsf1 in starvation stress<sup>80</sup>. In line with our findings, Hog1 has recently  
237 been reported to phosphorylate Hsf1 in osmostress<sup>81</sup>. Interestingly, the human Hog1 MAPK  
238 orthologue p38 also phosphorylates and activates Hsf1 upon treatment with an Hsp90 inhibiting  
239 compound<sup>82</sup>.

240 To get insights into HSR-regulated processes, we determined PK interactors from phospho-  
241 proteomics<sup>83</sup> and TF target genes from ChIP data<sup>84</sup> (Supplementary Fig. S20). Interactors of HSR-  
242 modulating PKs were enriched for functions in mitogen-activated protein kinase (MAPK) signalling (p-

243 value=3.3e-05) and cell cycle regulation (p-value=1.8e-03) (Supplementary Fig. S20d). Target genes  
244 of HSR-regulating TFs had roles in responses to heat and oxidative stress (p-value=7.2e-04), the fungal  
245 cell wall (p-value=6.5e-03) and trehalose metabolism (p-value=4.3e-03) (Supplementary Fig. S20e).  
246 This target-based analysis thus not only proved useful in recapitulating paramount mechanisms of  
247 heat resistance that are remodelled as part of the HSR<sup>18</sup>, but also implies that these processes are, at  
248 least partially, controlled by the same TFs that regulate chaperone expression.

249

### 250 ***Modulators of thermotolerance***

251 We were curious if genes adjusting the HSR pathway have stress-protective roles. We thus screened  
252 for thermotolerance, the cells' ability to survive a sudden and lethal heat shock (Fig. 4a). Briefly, yeast  
253 populations were selected at 50°C for 150 min (Supplementary Fig. S21) and recovered without  
254 maintaining CRISPRi perturbations. Comparing sequencing barcodes before and after heat shock, we  
255 identified twelve genes to promote and three to counteract thermotolerance, with minor or no impact  
256 on fitness (Supplementary Fig. S22 & Supplementary Tab. 1). Most thermotolerance modulators also  
257 physically interact with each other (14 of 15) holding the potential for cross-talk to fine-tune mutual  
258 activities (Fig. 4b).

259 Decreased thermotolerance was observed for repression of three TFs that also had heat sensitive  
260 fitness (Hsf1, Reb1, Cst6), and for PKs in stress signalling (Yak1, Rim15) and the HOG (Hog1, Pbs2),  
261 UPR (Ire1) and PKA pathways (Tpk2) (Supplementary Fig. S22). Increased thermotolerance was  
262 measured for CRISPRi strains of Sch9, a PK controlled by target of rapamycin (TOR) signalling<sup>85</sup>, the  
263 Sln1 sensor kinase of the HOG pathway<sup>86</sup>, and the uncharacterized kinase Ypl150W<sup>58</sup>. Only three of the  
264 measured thermotolerance effects were known according to SGD, including the enhanced heat  
265 resistance of *sch9Δ* and the reduced tolerance of *pbs2Δ* and *rim15Δ* strains<sup>43</sup>. Strikingly, dilution spot  
266 plating of individual CRISPRi strains confirmed thermotolerance effects of Hsf1 and Hog1 (Fig. 4e), as  
267 well as for Tpk2, Pbs2, Cst6 and Rsc30 (Supplementary Fig. S23). Repression of the *TOR1/ARP3* locus  
268 was used as negative control that strongly decreased growth, but not thermotolerance. Interestingly,  
269 CRISPRa strains of Hsf1 had wildtype thermotolerance, suggesting that increased Hsf1 abundance may  
270 not alter heat resistance, and thermotolerance was decreased for activation of Pbs2 (Supplementary  
271 Fig. S23).

272 Genes found to modulate both thermotolerance and the HSR reporter modulators encode for Hsf1,  
273 stress-related kinases (Sch9, Rim15) and components of the UPR (Ire1) and HOG pathways (Hog1,  
274 Pbs2) (Fig. 4c & d). The Yak1 and Ypl150W PKs (Supplementary Fig. S24a & b), as well as the Tpk1/2/3  
275 PKA subunits (Supplementary Fig. S25) were likely part of this overlap, although not fulfilling the strict  
276 significance requirements.

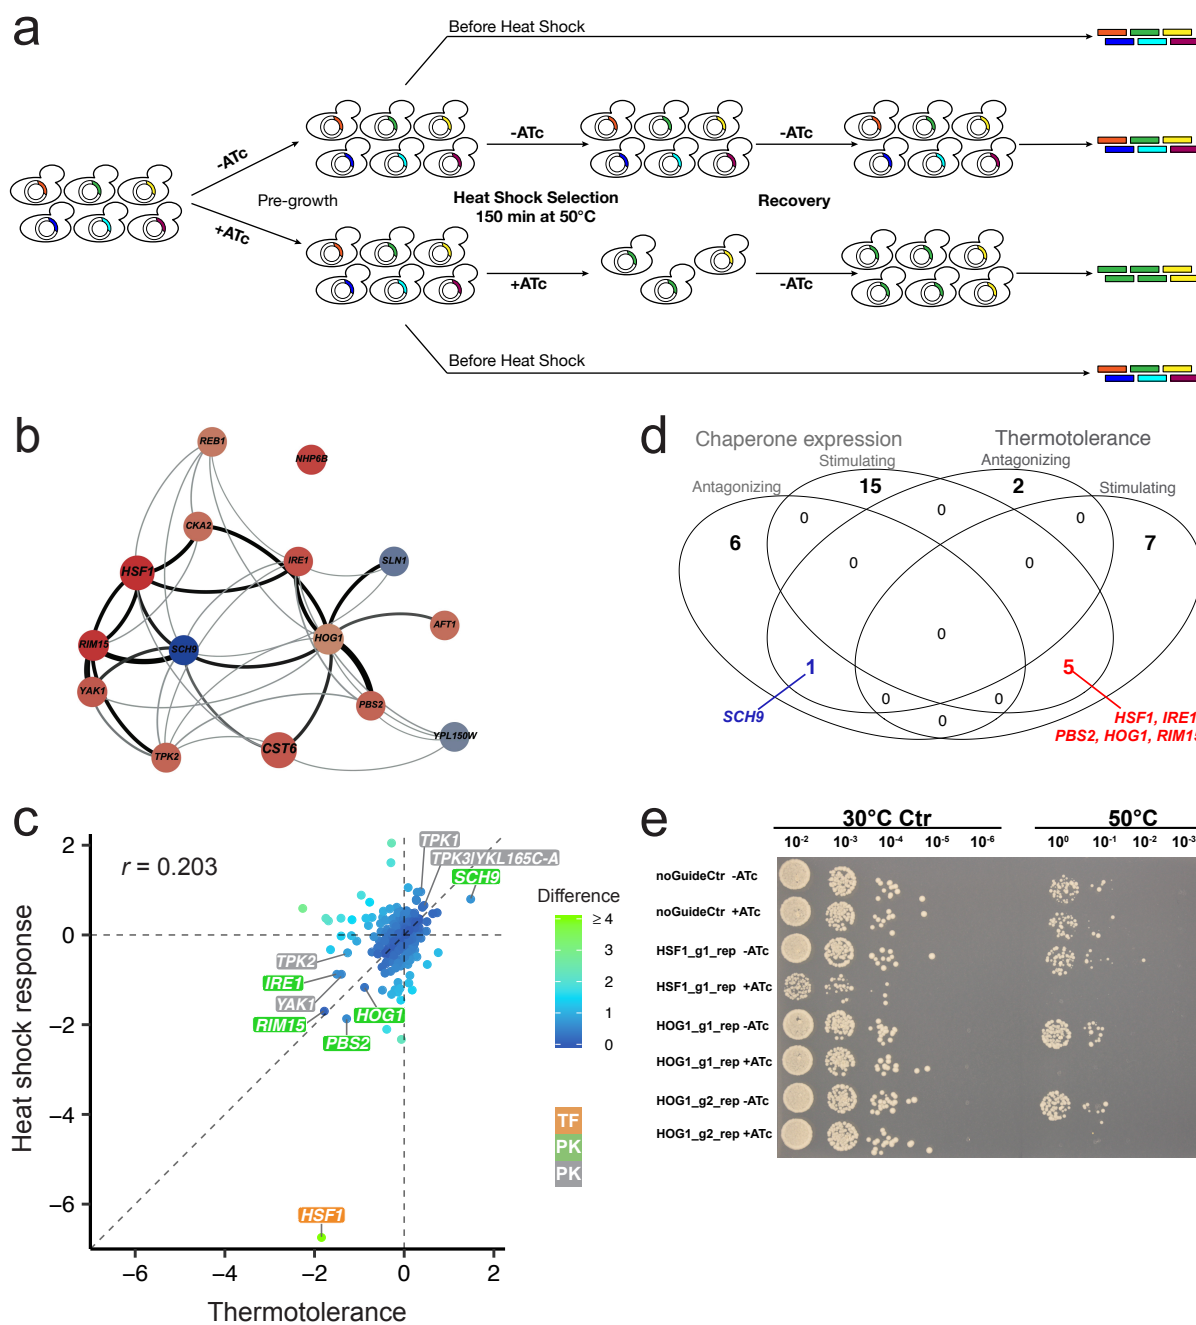

277

278 **Figure 4. Shared regulation of thermotolerance and HSR. a**, Schematic of the thermotolerance

279 screen. **b**, Protein-protein interaction network of thermotolerance modulators based on STRING<sup>108</sup>.

280 Line thickness indicates interaction confidence, and node size the screen p-value. Node colour denotes

281 increasing (blue) or decreasing (red) roles on thermotolerance based on screen results with a light to

282 dark gradient indicating low to strong effect size. **c**, Gene fold change comparison between the

283 thermotolerance and HSR screens. Significant modulators are labelled in orange (TFs) or green boxes

284 (PKs). Genes in grey boxes encode PKs that missed the stringent significance thresholds. Dashed lines

285 are intercepts marking a fold change of 0 and the diagonal. **d**, Venn diagram showing overlap of genes

286 altering thermotolerance and Hsp70 expression. **e**, Dilution spot plating of individual CRISPRi strains

287 grown with and without ATc at 30°C, or exposed to 50°C for 150 min.

288 **CRISPRi effect magnitude depends on temperature and phenotype**

289 We clustered effects across phenotypes to group genes by function (Fig. 5a), such as modulating fitness  
 290 with moderate (clusters II, V, VI) or severe impact (VII & VIII) or adjusting the HSR pathway (II, III, IV,  
 291 VII). Comparing CRISPRi magnitude across temperature, we found that effect size increased with  
 292 temperature (Fig. 5b; Supplementary Fig. S26). Notably, the gRNA sequence GC content and secondary  
 293 structure affects strain fitness with temperature-dependent contributions (Supplementary Fig. S27).  
 294 Finally, we observed that phenotypes vary in their sensitivity to knock-down, as shown for Hsf1 (Fig.  
 295 5c). All six *HSF1*-targeting gRNAs severely decreased chaperone expression, implying that Hsf1  
 296 abundance is diminished strong enough to indirectly affect the assayed reporter. However, only the  
 297 three most potent gRNAs affected fitness at 30°C, despite the essentiality of *HSF1* (Fig. 5c). Similar  
 298 effect size gradients were observed for *UME6* and *RSC30* with only a few strong gRNAs (derived from  
 299 HSR reporter impact) altering high temperature growth (Supplementary Fig. S28). Repression effects,  
 300 even if they translate to protein level changes, do therefore not necessarily impact a robust  
 301 downstream trait.

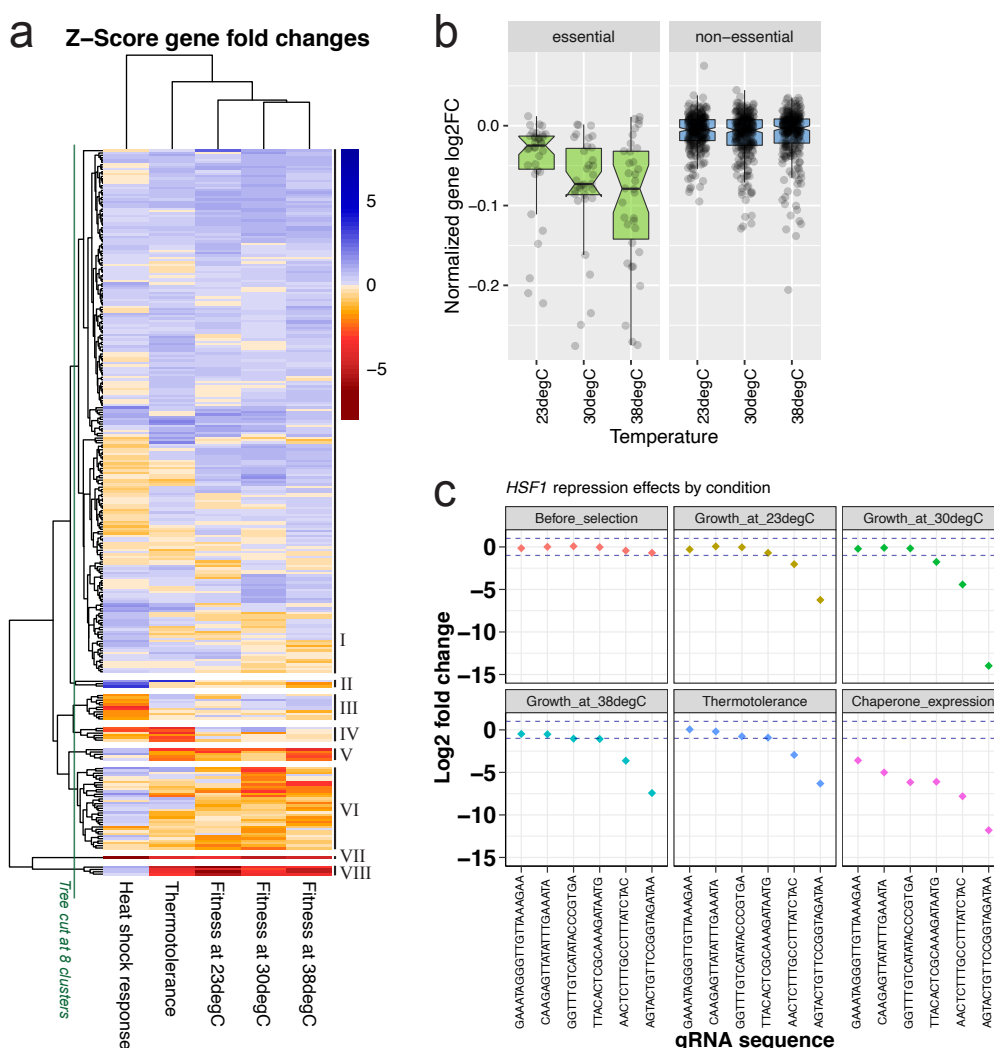

302  
 303 **Figure 5.** Knock-down sensitivity depends on growth and phenotype. **a**, Comparison of repression  
 304 effects between screens as Z-score gene log2FCs (n=290). The hierarchical tree of rows is arbitrarily

305 cut to form 8 clusters to group genes with shared effects, such as decreasing or increasing HSR activity  
 306 (II or III, respectively), decreasing thermotolerance and HSR activity (IV), or severe fitness defects  
 307 (VIII) upon repression. **b**, Temperature-dependent CRISPRi effects. Generation-normalized gene  
 308 log<sub>2</sub>FCs of fitness screens at different temperatures, grouped for essential (n=34) and non-essential  
 309 genes (n=255). **c**, Log<sub>2</sub>FCs (y-axis) of six HSF1-targeting gRNAs (x-axis) across screens. Dashed blue  
 310 lines denote log<sub>2</sub>FC cut-offs 1 and -1.

311

## 312 Discussion

313 We used CRISPRi screens to measure gene functions in temperature-associated growth, the heat shock  
 314 response (HSR) pathway and thermotolerance. The integration of these diverse phenotypic readouts  
 315 allowed us to reveal novel regulators of chaperone expression and link these to heat adaptation,  
 316 discovering unknown functions of cell cycle regulators and the HOG, UPR and PKA pathways.

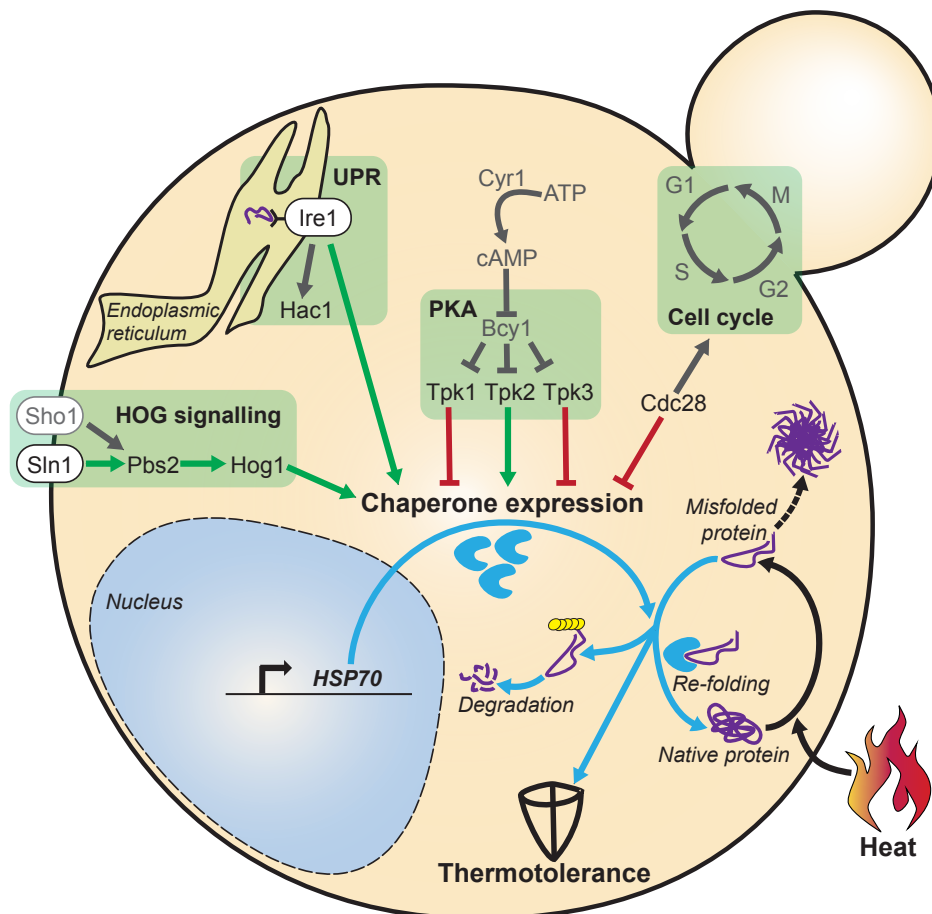

317

318 **Figure 6. The HSR is regulated by multiple molecular pathways that sense diverse**  
 319 **perturbations in different cellular compartments.** Schematic overview of pathways controlling  
 320 HSR activity based on screen-derived roles illustrated as stimulating (green arrows) and inhibiting (red  
 321 stop indicators), and complemented by known processes from literature (in grey). Heat causes  
 322 proteotoxic stress which is counteracted by cellular mechanisms, such as chaperone-mediated re-  
 323 folding of misfolded proteins, and their degradation. Signalling pathway components of the HOG, UPR  
 324

325 and PKA pathways modulate chaperone expression and thermotolerance. In addition, the roles of  
326 Cdc28 in promoting cell cycle progression and inhibiting HSR activity are shown. Further genetic roles  
327 measured in screens are omitted for clarity.

328

329 Our screens allowed us to pinpoint core regulatory components of the HSR capable of tuning  
330 thermotolerance by altering chaperone expression. We found central MAP kinases of the HOG pathway  
331 to stimulate thermotolerance and chaperone expression, thus explaining Hog1 activation in heat<sup>38-40</sup>  
332 with a role in protein homeostasis (Fig. 6). We showed that the UPR-triggering sensor kinase Ire1<sup>87</sup>  
333 increases the expression of a cytosolic Hsp70 (Fig. 4c, Supplementary Fig. S24). This suggests a role  
334 for the UPR in stimulating the HSR pathway, in line with the lowered activity of an artificial HSE  
335 reporter in the heat-exposed *ire1Δ* strain<sup>88</sup>. However, cytosolic HSPs were not previously known as  
336 UPR targets<sup>89</sup>. While PKA signalling is thought to counteract the HSR through inhibiting Msn2/4<sup>90-92</sup>  
337 and by indirectly repressing Hsf1 presumably via Yak1 and Rim15<sup>36,76,77</sup>, we show that only the Tpk1  
338 and Tpk3 subunits inhibit, while Tpk2 enhances Hsp70 production and thermotolerance  
339 (Supplementary Fig. S25a & b). This agrees with the increased Hsp12 expression and oxidative stress  
340 survival of *tpk1Δ* and *tpk3Δ* mutants, while both are decreased in *tpk2Δ*<sup>67</sup>. Additionally, differential  
341 Tpk1/2/3 roles are expected from their distinct physical interactors (Supplementary Fig. S25c) and  
342 phosphorylation patterns<sup>40</sup>.

343

344 Notably, the strongest HSR-antagonizing PK (Cdc28) is the only cyclin-dependent kinase (CDK) both  
345 necessary and sufficient to drive the cell cycle in *S. cerevisiae*<sup>93</sup>. While cell cycle arrest is a known  
346 consequence of the HSR<sup>94</sup>, we show that key cell cycle regulators also signal back to the stress response  
347 in a mutually inhibitory manner (Supplementary Fig. S18; Fig. 6). During stress recovery, CDK  
348 promotes re-entry into mitosis and could simultaneously shut down the remains of a stress response  
349 to quickly resume proliferation. Supporting this, the HSP abundance is frequently regulated depending  
350 on cell cycle stage<sup>95,96</sup>. Additionally, given that Hog1 blocks mitosis by suppressing Cdc28-activators<sup>97</sup>  
351 and its interacting cyclins in hyperosmotic conditions<sup>98</sup>, it presumably contributes to growth arrest  
352 also as part of the HSR.

353

354 We found repression effects to increase with temperature (Fig. 5b; Supplementary Fig. S26) which is  
355 likely due to both technical (CRISPRi system performance) and biological factors (sensitivity to knock-  
356 down caused by changes in transcription, translation and metabolism). We employed the  
357 *Streptococcus pyogenes* Cas9 fused to the human Mxi1 repressor which both evolved to operate around  
358 37°C. Accordingly, Cas9 has higher *in vitro* DNA cleavage efficiency at 37°C compared to 22°C<sup>99</sup>.  
359 Temperature may also affect gRNA hybridization, as proposed for microRNAs<sup>100</sup>, in line with  
360 temperature-dependent contributions of gRNA GC content and secondary structure (Supplementary  
361 Fig. S27). This needs to be considered when using CRISPRi at extreme temperatures in yeast and other  
362 microorganisms. In our study, we paid special attention to potential biases in heat sensitivity, defined

363 by contrasting fitness effects at 38 vs. 30°C. However, differences in strain dropout at these  
364 temperatures are minor compared to 23°C. The comparable mRNA depletion across temperatures in  
365 heat sensitive *HSF1* and *UME6* CRISPRi strains (Supplementary Fig. S15) and strong support by  
366 deletion strains reassured of measuring biological functions.

367

368 While repression is complementary to knock-out, we also measured novel fitness-modulatory roles  
369 (~11% of 30°C fitness screen hits) which are unlikely to result from off-targets due to their support  
370 by two or more gRNAs. Additionally, effects were reproduced in screens at varied temperatures  
371 (Supplementary Fig. S14). We hypothesize that the sudden mRNA depletion can yield a stressed cell  
372 state while deletion mutants may trigger bypassing mechanisms when outgrown over several  
373 generations, such as acquiring adaptive mutations<sup>101</sup>. In CRISPR-KO screens, selection is usually  
374 performed immediately after introducing mutations and thus yield effects that are more severe<sup>102</sup> or  
375 comparable to CRISPRi in human cells<sup>103</sup>, depending on assay setup. In future studies, it will be  
376 interesting to explore differential effects of knock-out and knock-down over time to explain the  
377 strengths and drawbacks of both techniques. Key advantages of the presented CRISPRi/a platforms  
378 are the inducible, reversible, and tunable modulation of transcription without altering genomic  
379 sequence and the ability to probe essential ORFs as demonstrated for *HSF1* (Fig. 1d & Fig. 5c).

380

381 A limitation of our HSR screens is given by the specificity of our reporter which monitors chaperone  
382 expression as a characteristic aspect of the HSR and may not report on other aspects. However,  
383 functional insights in PK phosphorylation targets and TF target genes illustrated the relevance of our  
384 screen hits for a variety of HSR-connected processes beyond HSP expression. Gene functions  
385 discovered by our screens can be directly applied in yeast biotechnology to generate strains with  
386 enhanced heat resistance or high temperature growth, i.e. to facilitate ethanol production<sup>104,105</sup>. If HSR-  
387 modulatory roles are conserved in human cells, they can be evaluated as therapeutic targets for disease  
388 treatment<sup>7,10</sup>. We anticipate that the established screen workflows and tools provide a basis to study  
389 diverse other reporters and molecular pathways, potentially expanding them to genome-wide scale  
390 and multiplexed application to infer genetic interactions and pathway connectivity.

391

## 392 **Material and Methods**

### 393 *Chemicals, oligonucleotides, plasmids and strains*

394 All chemical compounds, oligonucleotides, plasmids, and bacterial or yeast strains are listed in  
395 Additional File A1.

396

### 397 *Plasmid and strain construction*

398 The Tet-inducible dCas9-MxiI and dCas9-nGal4-VP64 plasmids are available on AddGene (#73796 and  
399 #71128). Chemically synthesized gRNA oligonucleotide libraries were purchased from CustomArray,

400 Inc. (GenScript) amplified by PCR and integrated into the NotI site of the pRS416 dCas9-Mxi1 plasmid  
401 via Gibson Assembly<sup>106</sup> with 30bp homology regions, or ligation with T4 DNA Ligase. Single gRNA  
402 oligos and primers were purchased from Sigma Aldrich, and cloned into the NotI site of plasmids.  
403 Plasmids were transformed into *E. coli* NEB10beta chemo- or electrocompetent cells (New England  
404 Biolabs). Plasmid extraction from *E. coli* cultures was performed with the QIAprep Spin Miniprep kit  
405 (Qiagen) and was combined with FastPrep (MP Biomedicals) to break the cell wall of *S. cerevisiae* using  
406 ~50µl volume of autoclaved glass beads (Sigma Aldrich) per cell pellet. FastPrep was run three-times  
407 at 5,5 m/s for 20s with 1min pausing. PCR was done using Phusion high fidelity polymerase (Thermo  
408 Fisher Scientific). Quality control of isolated DNA was performed with NanoDrop1000 (Thermo Fisher  
409 Scientific), Qubit spectro-fluorometer (Invitrogen) and High Sensitivity DNA Bioanalyzer chips  
410 (Agilent). For confirmation of sequence identity, plasmids and PCR products were submitted for  
411 Sanger sequencing to Eurofins Genomics. Template plasmids of PCR reactions were digested with DpnI  
412 for removal of bacterial DNA, and products were then used for Gibson Assembly or ligation. For library  
413 generation, multiple *E. coli* transformations were performed in parallel, pooled, and colonies of several  
414 selection plates were scraped together in a dense culture with LB-Ampicillin to ensure >20x coverage  
415 of libraries. Chemical transformation of *S. cerevisiae* was done as described previously<sup>107</sup>.  
416 Transformants were selected on synthetic complete uracil-dropout media (SC-Ura) agar plates. Single  
417 colonies were picked, confirmed by colony PCR and cultured for individual strain experiments.  
418 Transformations were sequence-verified by Sanger sequencing. Cell libraries were generated by  
419 washing off transformant colonies when reaching small size ~36h after plating. For long-term storage  
420 at -80°C, 25% glycerol stocks were prepared.

421

#### 422 *Plate reader growth and fluorescence assays*

423 Sequence-verified strains were cultured in 96 well round bottom plates (Thermo Fisher Scientific)  
424 filled with 100 µL in SC-Ura dropout media with or without 250 ng/ml ATc. Yeast cultures were  
425 inoculated with OD<sub>600</sub>=0.005 for growth measurements or OD<sub>600</sub>=0.3 for fluorescence  
426 measurements (GFP channel: 488 nm excitation and 512 nm emission wavelength) in 15 min intervals  
427 with Genios (Tecan) or Synergy HTX (Biotek) plate readers according to the manufacturer's  
428 instructions. The maximum growth rate and the time until half-maximum OD<sub>600</sub> were determined by  
429 fitting a linear model and calculating its slope using the cellGrowth R package (V. 1.30.0)<sup>108</sup>.

430

#### 431 *RNA extraction from yeast cells and qRT-PCR*

432 Exponential phase yeast cultures were diluted to OD<sub>600</sub>=0.3 and cultured with 250 ng/ml ATc or  
433 without ATc for either 4 or 6 hours at temperatures as indicated. Cells were collected using a vacuum  
434 filter device and instantly frozen in liquid nitrogen. Cells were then resuspended in Trizol (Invitrogen)  
435 and RNA was extracted using the Quick RNA Kit (Zymo Research) according to manufacturer's  
436 instructions. RNA was reverse-transcribed to cDNA using SuperScript III (Invitrogen) with RNasin  
437 (Promega, Life Technologies), Oligo(dT)18 (Thermo Fisher Scientific) and a reverse primer specific for



438 the 3' region of guide RNAs (see Additional File A1). This cDNA was diluted 1:10 or 1:20 and then used  
439 for SYBR Green quantitative reverse transcription PCR (qRT-PCR) using PowerUp SYBR Green PCR  
440 Master Mix (Thermo Fisher Scientific) and the Applied Bio-Systems QuantStudio 6 Flex Real-Time PCR  
441 System (Thermo Fisher Scientific). Analysis was performed with R code as follows: The log<sub>2</sub> fold  
442 change between +ATc samples and -ATc reference samples was computed as the negative delta delta  
443 Ct (-ddCt) with  $ddCt = ((\text{average transcript Ct}) - (\text{average } ACT1 \text{ house-keeping control Ct}) \text{ of } +ATc$   
444  $\text{condition}) - ((\text{average transcript Ct}) - (\text{average } ACT1 \text{ house-keeping control Ct}) \text{ of } -ATc \text{ reference}$   
445  $\text{condition})$ . Average Ct values were calculated from triplicates. Primers were designed to yield  
446 products of 75-130 nucleotides and are listed in Additional File A1.

447

#### 448 *Microscopy and image analysis*

449 To quantify cellular reporter gene expression, cells were imaged with the Zeiss CellObserver  
450 microscope (Carl Zeiss AG) during cultivation at 30°C and after 5h exposure to 42°C. Images were  
451 acquired with the ZEN Black software, and analysis was performed with KNIME to quantify cellular  
452 GFP signals<sup>109</sup> and R<sup>110</sup> for data visualization.

453

#### 454 *Choice of HSR reporter*

455 In search of a suitable reporter for HSR activity, we prioritized genes by their stress-related  
456 expression<sup>11, 111</sup>. We evaluated 44 Green Fluorescent Protein (GFP) tag strains<sup>112</sup> on fluorescence  
457 induction after heat shock and found the *SSA1-GFP* fusion strain to yield the highest and most stable  
458 reporter signal in this panel (Supplementary Fig. S29). To quantify *in vivo* HSR activity, and for all  
459 screens presented, we employed a diploid BY4743 strain<sup>113</sup> harbouring a chromosomally integrated  
460 reporter, consisting of the highly heat-responsive *SSA1* promoter with a Δ-280 bp truncation<sup>52</sup> which  
461 controls expression of a fast-maturing GFP<sup>54</sup>. This reporter was chosen over artificial TF-specific  
462 promoters<sup>26,114</sup> to measure effects of various transcription factors that affect Hsp70 expression.

463

#### 464 *Design of gRNA libraries*

465 Guide RNA oligonucleotides were designed to target 161 TFs<sup>57</sup> (retrieved from  
466 [yetfasco.ccb.utoronto.ca](http://yetfasco.ccb.utoronto.ca) on 16/04/2014 using DNA-binding=1 and dubious=false parameters) and  
467 129 PKs<sup>56</sup> (retrieved from [yeastkinome.org](http://yeastkinome.org) on 16/04/2014). Libraries consist of 885 and 668 gRNAs,  
468 respectively. Each gene was covered by up to six different gRNAs to minimize off-target effect calling  
469 (Supplementary Fig. S2a). Guide RNAs were designed considering the distance of their midpoint (of  
470 the 20nt target sequence) to the respective TSS<sup>115</sup> and nucleosome occupancy<sup>116</sup>. Blast  
471 ([blast.ncbi.nlm.nih.gov/Blast.cgi](http://blast.ncbi.nlm.nih.gov/Blast.cgi)) and ECRISP (version 5.4)<sup>117</sup> were used to check potential off-target  
472 binding sites in the yeast genome, allowing for two mismatches at most. The gRNA design pipeline was  
473 published as part of Smith et al. (2016) and is available at [lp2.github.io/yeast-crispri/](https://lp2.github.io/yeast-crispri/). Potentially  
474 regulated TSS in close proximity to the intentional target TSS (Supplementary Fig. S2b) are included

475 in the gene name. Specifically, if two or more gRNAs designed for “gene1” potentially targeted the TSS  
476 of another “gene2” within 150 nt distance<sup>47</sup>, the target locus is annotated as “gene1|gene2”.

477

#### 478 *Screens*

479 Plasmid libraries targeting sets of either TFs or PKs were transformed and profiled individually.  
480 Screens were performed with 30 ml bulk yeast populations in 150 ml flasks. Populations were pre-  
481 grown at 30°C with or without 250 ng/ml ATc for 10 h (~3 generations) before selection to enable  
482 acquisition of CRISPRi-mediated changes on protein and phenotype level. This pre-growth had minor  
483 effects on strain composition of populations (Supplementary Fig. S3) so that almost every gRNA  
484 barcode in the design (>98%) was probed.

485

#### 486 *Competitive growth screens*

487 For competitive growth selection, pre-grown cultures were diluted to OD<sub>600</sub>=0.005 and grown over  
488 1.5–2 days at temperatures 23, 30 or 38°C. Fitness screens were performed with two replicates. Due  
489 to anhydrotetracycline instability at high temperature, we confirmed that the compound maintains its  
490 biological activity in the used concentration over at least 3 days at 38°C (Supplementary Fig. S30).

491

#### 492 *HSR screens and FACS*

493 For HSR screens, pre-grown cultures were diluted to OD<sub>600</sub>=0.3, exposed to 42°C for 5 h to induce the  
494 *SSA1pr-GFP* reporter and sorted with flow cytometry. Sorting was performed immediately after heat  
495 shock to measure effects during the stress as opposed to recovery. 250.000 – 500.000 cells within the  
496 top and bottom 5% of cellular GFP reporter intensity were collected by FACS. Gating was used to select  
497 cells representing the bulk population in forward and sideward scattering, and to exclude dividing  
498 cells (Supplementary Fig. S31). Sorted cells were recovered for ~5 generations without CRISPRi  
499 induction and accounting for growth arrest. HSR screens were performed in three replicates. Flow  
500 cytometry was performed using a MoFlo cell sorter (Beckman Coulter Inc.), equipped with a 70 µm  
501 nozzle. A Sabre argon ion laser (Coherent Inc.), tuned to 488nm (200mW) was used as primary laser.  
502 Laser illumination, optical configuration and sorting parameters were optimized with Flow-Check  
503 fluorospheres (Beckman Coulter Inc.). Single cells were measured and sorted in purify one-drop mode.  
504 Data was acquired with Moflo Summit and analysed with R code<sup>110</sup>.

505

#### 506 *Thermotolerance screens*

507 For thermotolerance selection, cultures were diluted to OD<sub>600</sub>=0.3, exposed to 50°C for 150 min and  
508 recovered for ~7 generations considering growth arrest and rate during recovery (Supplementary Fig.  
509 S21). Two samples did not pass quality control and were excluded from analysis (PK after heat shock  
510 +ATc Rep2 & TF after heat shock -ATc Rep2 in Supplementary Fig. S13). Thermotolerance screens  
511 were performed in two replicates for the TF and four replicates for the PK library.

512

513 *Next generation sequencing*

514 QuBit (Thermo Fisher Scientific) was used to quantify extracted plasmid DNA. To amplify gRNA  
515 barcodes, PCR was performed with ~5 ng plasmid DNA as template and primers that add inline  
516 barcodes and Illumina P5 and P7 adapters (listed in Additional file A1). PCR products of all samples  
517 were run on 1% Agarose gel with SYBR Safe (Invitrogen) to control DNA amount, size and purity. Gel  
518 bands of PCR products were excised and DNA purified with the MinElute kit (Qiagen). After DNA  
519 quantification by QuBit, equal amounts of PCR products were pooled. This sequencing library was size-  
520 selected with an eGel (Thermo Fisher Scientific) and controlled for purity on a DNA-Bioanalyzer high  
521 sensitivity chip (Agilent). Illumina sequencing was performed in paired-end and 75-100 base pairs  
522 read length on NextSeq500 machines with 15% PhiX spike-in.

523

524 *Sequencing data analysis*

525 Sequencing data was demultiplexed with Jemultiplexer. Base calling quality was controlled with  
526 FastQC. Reads were trimmed and aligned to a reference FASTA file with DNA barcodes using the  
527 Burrows-Wheeler algorithm to compute read counts. Computational analysis was performed with the  
528 edgeR R package<sup>118</sup> although other count-based packages can alternatively be used. Fold changes of  
529 fitness screens were calculated as contrasts of read counts between +ATc and -ATc populations that  
530 both underwent competitive growth selection (Fitness effect). Fold changes of the thermotolerance  
531 screen are ratios between +ATc samples after versus before heat shock (thermotolerance effect), and  
532 for the HSR screen denote ratios between +ATc samples sorted for high versus low cellular reporter  
533 intensity (HSR effect). For all screens, we provide sample correlations of read counts (Supplementary  
534 Fig. S13), as well as for the computed gRNA log<sub>2</sub>FCs (Supplementary Fig. S32) and gene log<sub>2</sub>FCs  
535 (Supplementary Fig. S33). Gene log<sub>2</sub>FCs were computed as the mean log<sub>2</sub>FC of gRNAs per gene and  
536 also be calculated without prior calculation of gRNA log<sub>2</sub>FCs directly from the geometric mean of gRNA  
537 reads per gene. A single analysis workflow thus enables computation of log<sub>2</sub>FCs and adjusted p-  
538 values/FDRs for genes and individual gRNAs (Supplementary Fig. S34). We benchmarked approaches  
539 to calculate gene scores. We report gene scores as mean log<sub>2</sub>FC of all gRNAs per gene since it  
540 performed better or as well as other measures, including median and rank-based scores (see  
541 Supplementary Fig. S35 for correlation plots and Supplementary Fig. S36 for receiver operating  
542 characteristics and precision-recall curves) and has higher robustness against noise and off-targets.  
543 Significant gene functions are supported by a gene log<sub>2</sub>FC with FDR<0.05 and at least two gRNAs with  
544 an absolute log<sub>2</sub>FC>=1 and FDR<0.05. Fold changes between non-induced samples (-ATc) are helpful  
545 to determine the background variation without CRISPR-based perturbation for each screen  
546 (Supplementary Fig. S37).

547

548 *Gene ontology (GO) enrichments and target gene analysis*

549 GO enrichment analyses were performed using the gProfiler<sup>119</sup> and gProfiler2 R packages<sup>120</sup>.  
550 Significant genes are queried with all target genes of the library as a statistical background. Major

551 cellular processes and functions are reported as enriched with adjusted Benjamini Hochberg FDRs  
552 specified. TF target genes were determined based on Chromatin Immuno-Precipitation on chip (ChIP-  
553 chip) data<sup>84</sup>. Target genes bound by at least two TFs identified as significant modulators were used for  
554 GO enrichment, using the *S. cerevisiae* genome as background. Phosphorylation targets of protein  
555 kinases were determined using the phosphogrid 2.0 database<sup>83</sup>. Physical interactors of significant PKs  
556 were used for enrichment analysis with a background consisting of all identified *S. cerevisiae* protein  
557 kinase targets.

558

#### 559 *Dilution spot plating thermotolerance assays*

560 Individual CRISPRi/a strains were cultured in SC-Ura with or without 250 ng/ml ATc for 1 day, diluted  
561 to OD<sub>600</sub>=0.3 and exposed to a 50°C in a table incubator (Eppendorf AG) for either 150 min or 90 min  
562 as indicated. A dilution series was prepared in SC-Ura and 10 µl of each dilution was plated on SC-Ura  
563 agar plates for the recovery of cells that survived the treatment without CRISPRi induction. After 2-3  
564 days incubation at 30°C, photographs of plates were taken and colonies counted.

565

#### 566 *Computational preparation and visualization*

567 Figures were prepared using Adobe Illustrator 2019. Data was processed in R (V. 3.4.1)<sup>110</sup> with the  
568 tidyverse<sup>121</sup> and dplyr<sup>122</sup> packages, and plots were generated with the LSD (V. 3.0)<sup>123</sup>, ggplot2 (V.  
569 3.1.0)<sup>124</sup> and ggally (V. 1.3)<sup>125</sup> packages. Minimum free energies of RNA secondary structure were  
570 computed using the ViennaRNA package (V. 2.0)<sup>126</sup>. Networks were generated with Gephi<sup>127</sup>, using  
571 protein-protein interaction data from the STRING database<sup>128</sup>.

572

#### 573 *Statistics*

574 For screens, multiple testing adjusted p-values (Benjamini Hochberg FDRs) were calculated with  
575 standard edgeR functions<sup>118</sup> as described. For microscopy data comparisons between sample  
576 populations, a two-sided Wilcoxon adjusted p-value was computed using the ggpubr (V. 0.3.0) R  
577 package<sup>129</sup>. Boxplots are shown with a middle line corresponding to the median, and the lower and  
578 upper hinges denoting the first and third quartiles, respectively. For all experiments with multiple data  
579 points, these represent distinct samples and not repeated measurements.

580

#### 581 *Code availability*

582 The KNIME image analysis workflow is available on request. The R code for screen analysis can be  
583 downloaded from [https://github.com/IAMTheMatrix/CRISPRi\\_Screen\\_Analysis/](https://github.com/IAMTheMatrix/CRISPRi_Screen_Analysis/).

584

#### 585 *Data availability*

586 Demultiplexed Illumina sequencing data has been uploaded to Gene Expression Omnibus, available  
587 through GSE155455. The raw read counts and computed fold changes of gRNA barcodes and genes are

588 provided as Additional Files A2, A3 and A4, respectively. Source data underlying figures is provided in  
589 Additional File A5.

590

### 591 **Supplementary Information**

592 Supplementary Figures S1-S37 and Supplementary Table 1 are provided as two pdf files. Additional  
593 Files A1-A5 are xlsx files listing reagents, strains, DNA sequences, providing raw and processed  
594 sequencing data and source data to figures.

595

### 596 **Acknowledgements**

597 The authors are grateful to Tanja Specht and Marko Kaksonen (University of Geneva) for sharing yeast  
598 GFP collection strains, and to Marc Sherman and Barak Cohen (Washington University, St. Louis) for  
599 kindly providing the SSA1pr-GFP reporter strain. The authors thank Mart Loog (University of Tartu),  
600 Timo Mühlhaus and Michael Schroda (University of Kaiserslautern) for productive discussions, Lin Gen  
601 and Aaron Brooks for computational support, and the EMBL Advanced Light Microscopy, Genomics  
602 and Flow Cytometry facilities for their excellent support, especially Diana Ordonez, Malte Paulsen and  
603 Vladimir Benes. This work was supported by an Advanced Investigator grant from the European  
604 Research Council (ERC) under the European Union's Horizon 2020 research and innovation  
605 programme (AdG-742804 to L.M.S.) by the Deutsche Forschungsgemeinschaft (DFG, German Research  
606 Foundation; project STE 1422/4-1 to L.M.S.), by Estonian Research Council (IUT 34-4 to L.P.), a Marie  
607 Curie International Outgoing Fellowship to L.P., and Wellcome (grant number 206194 supporting L.P.).  
608 C.J. was supported by an Interdisciplinary Sciences Fellowship of the Joachim Herz Foundation.

609

### 610 **Competing Interests**

611 The authors declare no competing interests.

612

### 613 **Contributions**

614 C.J. conceived the study, designed and performed experiments, analysed data and wrote the  
615 manuscript. A.J. assisted with thermotolerance screens. L.P. designed and J.D.S generated gRNA  
616 libraries. A.J., J.D.S., L.P. and L.M.S. provided valuable advice and revised the manuscript. L.P. and L.M.S.  
617 supervised the study.

618

### 619 **References**

- 620 1. Ananthan, J., Goldberg, A. L. & Voellmy, R. Abnormal proteins serve as eukaryotic stress signals and  
621 trigger the activation of heat shock genes. *Science (80-. )*. **232**, 522–524 (1986).
- 622 2. Hartl, F. U. Molecular chaperones in cellular protein folding. *Nature* vol. 381 571–580 (1996).
- 623 3. Piper, P. W. Molecular events associated with acquisition of heat tolerance by the yeast  
624 *Saccharomyces cerevisiae*. *FEMS Microbiol. Rev.* **11**, 339–355 (1993).

- 625 4. Ritossa, F. A new puffing pattern induced by temperature shock and DNP in drosophila. *Experientia*  
626 **18**, 571–573 (1962).
- 627 5. Richter, K., Haslbeck, M. & Buchner, J. The Heat Shock Response: Life on the Verge of Death. *Mol. Cell*  
628 **40**, 253–266 (2010).
- 629 6. Hartl, F. U., Bracher, A. & Hayer-Hartl, M. Molecular chaperones in protein folding and proteostasis.  
630 *Nature* **475**, 324–332 (2011).
- 631 7. Kampinga, H. H. & Bergink, S. Heat shock proteins as potential targets for protective strategies in  
632 neurodegeneration. *The Lancet Neurology* vol. 15 748–759 (2016).
- 633 8. Maiti, P. & Manna, J. Dysregulation of Heat Shock Proteins in Neurodegenerative Diseases:  
634 Restorative Roles of Small Molecules and Natural Compounds. in *Heat Shock Proteins in Neuroscience*  
635 85–114 (Springer, 2019). doi:10.1007/978-3-030-24285-5\_7.
- 636 9. Ben-Zvi, A., Miller, E. A. & Morimoto, R. I. Collapse of proteostasis represents an early molecular  
637 event in *Caenorhabditis elegans* aging. *Proc. Natl. Acad. Sci. U. S. A.* **106**, 14914–14919 (2009).
- 638 10. Dong, B., Jaeger, A. M. & Thiele, D. J. Inhibiting Heat Shock Factor 1 in Cancer: A Unique Therapeutic  
639 Opportunity. *Trends in Pharmacological Sciences* vol. 40 986–1005 (2019).
- 640 11. Gasch, A. P. *et al.* Genomic expression programs in the response of yeast cells to environmental  
641 changes. *Mol. Biol. Cell* **11**, 4241–4257 (2000).
- 642 12. Causton, H. C. *et al.* Remodeling of yeast genome expression in response to environmental changes.  
643 *Mol. Biol. Cell* **12**, 323–337 (2001).
- 644 13. Hahn, J.-S., Hu, Z., Thiele, D. J. & Iyer, V. R. Genome-Wide Analysis of the Biology of Stress Responses  
645 through Heat Shock Transcription Factor. *Mol. Cell. Biol.* **24**, 5249–5256 (2004).
- 646 14. Nagaraj, N. *et al.* System-wide perturbation analysis with nearly complete coverage of the yeast  
647 proteome by single-shot ultra HPLC runs on a bench top orbitrap. *Mol. Cell. Proteomics* **11**, 1–11  
648 (2012).
- 649 15. Mahat, D. B., Salamanca, H. H., Duarte, F. M., Danko, C. G. & Lis, J. T. Mammalian Heat Shock Response  
650 and Mechanisms Underlying Its Genome-wide Transcriptional Regulation. *Mol. Cell* **62**, 63–78  
651 (2016).
- 652 16. Määttä, T., Rettel, M., Helm, D., Stein, F. & Savitski, M. Aggregation and Disaggregation Features of  
653 the Human Proteome. *bioRxiv* (2020) doi:10.1101/2020.02.05.931675.
- 654 17. Mühlhofer, M. *et al.* The Heat Shock Response in Yeast Maintains Protein Homeostasis by  
655 Chaperoning and Replenishing Proteins. *Cell Rep.* **29**, 4593–4607.e8 (2019).
- 656 18. Verghese, J., Abrams, J., Wang, Y. & Morano, K. A. Biology of the Heat Shock Response and Protein  
657 Chaperones: Budding Yeast (*Saccharomyces cerevisiae*) as a Model System. *Microbiol. Mol. Biol. Rev.*  
658 **76**, 115–158 (2012).
- 659 19. Morano, K. A., Grant, C. M. & Moye-Rowley, W. S. The response to heat shock and oxidative stress in  
660 *saccharomyces cerevisiae*. *Genetics* **190**, 1157–1195 (2012).
- 661 20. Abravaya, K., Myers, M. P., Murphy, S. P. & Morimoto, R. I. The human heat shock protein hsp70  
662 interacts with HSF, the transcription factor that regulates heat shock gene expression. *Genes Dev.* **6**,  
663 1153–1164 (1992).
- 664 21. Baler, R., Welch, W. J. & Voellmy, R. Heat shock gene regulation by nascent polypeptides and

- 665 denatured proteins: hsp70 as a potential autoregulatory factor. *J. Cell Biol.* **117**, 1151–1159 (1992).
- 666 22. Wang, Y., Gibney, P. A., West, J. D. & Morano, K. A. The yeast Hsp70 Ssa1 is a sensor for activation of  
667 the heat shock response by thiol-reactive compounds. *Mol. Biol. Cell* **23**, 3290–3298 (2012).
- 668 23. Krakowiak, J. *et al.* Hsf1 and Hsp70 constitute a two-component feedback loop that regulates the  
669 yeast heat shock response. *Elife* **7**, 1–17 (2018).
- 670 24. Sorger, P. K. & Pelham, H. R. B. Yeast heat shock factor is an essential DNA-binding protein that  
671 exhibits temperature-dependent phosphorylation. *Cell* **54**, 855–864 (1988).
- 672 25. Zheng, X. *et al.* Dynamic control of Hsf1 during heat shock by a chaperone switch and  
673 phosphorylation. *Elife* **5**, (2016).
- 674 26. Brandman, O. *et al.* A ribosome-bound quality control complex triggers degradation of nascent  
675 peptides and signals translation stress. *Cell* **151**, 1042–1054 (2012).
- 676 27. Raychaudhuri, S. *et al.* Interplay of acetyltransferase EP300 and the proteasome system in regulating  
677 heat shock transcription factor 1. *Cell* **156**, 975–985 (2014).
- 678 28. Solís, E. J. *et al.* Defining the Essential Function of Yeast Hsf1 Reveals a Compact Transcriptional  
679 Program for Maintaining Eukaryotic Proteostasis. *Mol. Cell* **63**, 60–71 (2016).
- 680 29. Veri, A. O., Robbins, N. & Cowen, L. E. Regulation of the heat shock transcription factor Hsf1 in fungi:  
681 Implications for temperature-dependent virulence traits. *FEMS Yeast Research* vol. 18 (2018).
- 682 30. Saavedra, C., Tuug, K. S., Amberg, D. C., Hopper, A. K. & Cole, C. N. Regulation of mRNA export in  
683 response to stress in *Saccharomyces cerevisiae*. *Genes Dev.* **10**, 1608–1620 (1996).
- 684 31. Castells-Roca, L. *et al.* Heat shock response in yeast involves changes in both transcription rates and  
685 mRNA stabilities. *PLoS One* **6**, (2011).
- 686 32. Zid, B. M. & O’Shea, E. K. Promoter sequences direct cytoplasmic localization and translation of  
687 mRNAs during starvation in yeast. *Nature* **514**, 117–121 (2014).
- 688 33. Ketela, T., Green, R. & Bussey, H. *Saccharomyces cerevisiae* Mid2p is a potential cell wall stress  
689 sensor and upstream activator of the PKC1-MPK1 cell integrity pathway. *J. Bacteriol.* **181**, 3330–  
690 3340 (1999).
- 691 34. Bermejo, C. *et al.* The sequential activation of the yeast HOG and SLT2 pathways is required for cell  
692 survival to cell wall stress. *Mol. Biol. Cell* **19**, 1113–1124 (2008).
- 693 35. Bandhakavi, S. *et al.* Hsf1 activation inhibits rapamycin resistance and TOR signaling in yeast  
694 revealed by combined proteomic and genetic analysis. *PLoS One* **3**, (2008).
- 695 36. Ferguson, S. B. *et al.* Protein kinase A regulates constitutive expression of small heat-shock genes in  
696 an Msn2/4p-independent and Hsf1p-dependent manner in *Saccharomyces cerevisiae*. *Genetics* **169**,  
697 1203–1214 (2005).
- 698 37. Zou, J., Guo, Y., Guettouche, T., Smith, D. F. & Voellmy, R. Repression of heat shock transcription factor  
699 HSF1 activation by HSP90 (HSP90 complex) that forms a stress-sensitive complex with HSF1. *Cell*  
700 **94**, 471–480 (1998).
- 701 38. Winkler, A. *et al.* Heat Stress Activates the Yeast High-Osmolarity Glycerol Mitogen-Activated  
702 Protein Kinase Pathway, and Protein Tyrosine Phosphatases. *Society* **1**, 163–173 (2002).
- 703 39. Dunayevich, P. *et al.* Heat-stress triggers MAPK crosstalk to turn on the hyperosmotic response  
704 pathway. *Sci. Rep.* **8**, 1–15 (2018).

- 705 40. Kanshin, E., Kubiniok, P., Thattikota, Y., D'Amours, D. & Thibault, P. Phosphoproteome dynamics of  
706 *Saccharomyces cerevisiae* under heat shock and cold stress. *Mol. Syst. Biol.* **11**, 813 (2015).
- 707 41. Berry, D. B. & Gasch, A. P. Stress-activated genomic expression changes serve a preparative role for  
708 impending stress in yeast. *Mol. Biol. Cell* **19**, 4580–4587 (2008).
- 709 42. Gibney, P. A., Lu, C., Caudy, A. A., Hess, D. C. & Botstein, D. Yeast metabolic and signaling genes are  
710 required for heat-shock survival and have little overlap with the heat-induced genes. *Proc. Natl.*  
711 *Acad. Sci. U. S. A.* **110**, (2013).
- 712 43. Jarolim, S. *et al.* *Saccharomyces cerevisiae* genes involved in survival of heat shock. *G3 Genes,*  
713 *Genomes, Genet.* **3**, 2321–2333 (2013).
- 714 44. Gilbert, L. A. *et al.* Genome-Scale CRISPR-Mediated Control of Gene Repression and Activation. *Cell*  
715 **159**, 647–661 (2014).
- 716 45. Gilbert, L. A. *et al.* CRISPR-mediated modular RNA-guided regulation of transcription in eukaryotes.  
717 *Cell* **154**, 442 (2013).
- 718 46. Smith, J. D. *et al.* Quantitative CRISPR interference screens in yeast identify chemical-genetic  
719 interactions and new rules for guide RNA design. *Genome Biol.* **17**, 1–16 (2016).
- 720 47. Smith, J. D. *et al.* A method for high-throughput production of sequence-verified DNA libraries and  
721 strain collections. *Mol. Syst. Biol.* **13**, 913 (2017).
- 722 48. Jaffe, M. *et al.* Improved discovery of genetic interactions using CRISPRiSeq across multiple  
723 environments. *Genome Res.* **29**, 668–681 (2019).
- 724 49. McGlincy, N. J. *et al.* A genome-scale CRISPR interference guide library enables comprehensive  
725 phenotypic profiling in yeast. *bioRxiv* 2020.03.11.988105 (2020) doi:10.1101/2020.03.11.988105.
- 726 50. Momen-Roknabadi, A., Oikonomou, P. & Tavazoie, S. An inducible CRISPR-interference library for  
727 genetic interrogation of *Saccharomyces cerevisiae* biology. *bioRxiv* 2020.03.05.978619 (2020)  
728 doi:10.1101/2020.03.05.978619.
- 729 51. Farzadfard, F., Perli, S. D. & Lu, T. K. Tunable and multifunctional eukaryotic transcription factors  
730 based on CRISPR/Cas. *ACS Synth. Biol.* **2**, 604–613 (2013).
- 731 52. Slater, M. R. & Craig, E. A. Transcriptional regulation of an hsp70 heat shock gene in the yeast  
732 *Saccharomyces cerevisiae*. *Mol. Cell. Biol.* **7**, 1906–1916 (1987).
- 733 53. Bush, G. L. & Meyer, D. I. The refolding activity of the yeast heat shock proteins Ssa1 and Ssa2 defines  
734 their role in protein translocation. *J. Cell Biol.* **135**, 1229–1237 (1996).
- 735 54. Sherman, M. S., Lorenz, K., Lanier, M. H. & Cohen, B. A. Cell-to-Cell Variability in the Propensity to  
736 Transcribe Explains Correlated Fluctuations in Gene Expression. *Cell Syst.* **1**, 315–325 (2015).
- 737 55. Jonge, W. J. *et al.* Molecular mechanisms that distinguish TFIID housekeeping from regulatable SAGA  
738 promoters. *EMBO J.* **36**, 274–290 (2017).
- 739 56. Breitkreutz, A. *et al.* A global protein kinase and phosphatase interaction network in yeast. *Science*  
740 *(80-. ).* **328**, 1043–1046 (2010).
- 741 57. De Boer, C. G. & Hughes, T. R. YeTFaSCo: A database of evaluated yeast transcription factor sequence  
742 specificities. *Nucleic Acids Res.* **40**, (2012).
- 743 58. Cherry, J. M. *et al.* SGD: *Saccharomyces* genome database. *Nucleic Acids Res.* (1998)  
744 doi:10.1093/nar/26.1.73.



- 745 59. Hahn, J. S. & Thiele, D. J. Activation of the *Saccharomyces cerevisiae* Heat Shock Transcription Factor  
746 under Glucose Starvation Conditions by Snf1 Protein Kinase. *J. Biol. Chem.* **279**, 5169–5176 (2004).
- 747 60. Kim, K. Y. & Levin, D. E. Transcriptional reporters for genes activated by cell wall stress through a  
748 non-catalytic mechanism involving Mpk1 and SBF. *Yeast* **27**, 541–548 (2010).
- 749 61. Pincus, D. *et al.* Genetic and epigenetic determinants establish a continuum of Hsf1 occupancy and  
750 activity across the yeast genome. *Mol. Biol. Cell* **29**, 3168–3182 (2018).
- 751 62. Ruiz-Roig, C., Viéitez, C., Posas, F. & De Nadal, E. The Rpd3L HDAC complex is essential for the heat  
752 stress response in yeast. *Mol. Microbiol.* **76**, 1049–1062 (2010).
- 753 63. Wu, W. S. & Li, W. H. Identifying gene regulatory modules of heat shock response in yeast. *BMC*  
754 *Genomics* **9**, 1–15 (2008).
- 755 64. Clifton, D., Weinstock, S. B. & Fraenkel, D. G. Glycolysis mutants in *Saccharomyces cerevisiae*.  
756 *Genetics* **88**, 1–11 (1978).
- 757 65. Schmidt, A., Kunz, J. & Hall, M. N. TOR2 is required for organization of the actin cytoskeleton in yeast.  
758 *Proc. Natl. Acad. Sci. U. S. A.* **93**, 13780–13785 (1996).
- 759 66. Vinayachandran, V. *et al.* Widespread and precise reprogramming of yeast protein-genome  
760 interactions in response to heat shock. *Genome Res.* **28**, 357–366 (2018).
- 761 67. Sadeh, A., Movshovich, N., Volokh, M., Gheber, L. & Aharoni, A. Fine-tuning of the Msn2/4-mediated  
762 yeast stress responses as revealed by systematic deletion of Msn2/4 partners. *Mol. Biol. Cell* **22**,  
763 3127–3138 (2011).
- 764 68. Gutin, J., Sadeh, A., Rahat, A., Aharoni, A. & Friedman, N. Condition-specific genetic interaction maps  
765 reveal crosstalk between the cAMP / PKA and the HOG MAPK pathways in the activation of the  
766 general stress response. *Mol. Syst. Biol.* **11**, 829 (2015).
- 767 69. Martínez-Pastor, M. T. *et al.* The *Saccharomyces cerevisiae* zinc finger proteins Msn2p and Msn4p  
768 are required for transcriptional induction through the stress response element (STRE). *EMBO J.* **15**,  
769 2227–2235 (1996).
- 770 70. Sakaki, K., Tashiro, K., Kuhara, S. & Mihara, K. Response of Genes Associated with Mitochondrial  
771 Function to Mild Heat Stress in Yeast *Saccharomyces cerevisiae*. *J. Biochem.* **134**, 373–384 (2003).
- 772 71. Trotter, E. W. *et al.* Misfolded proteins are competent to mediate a subset of the responses to heat  
773 shock in *Saccharomyces cerevisiae*. *J. Biol. Chem.* **277**, 44817–44825 (2002).
- 774 72. Lamb, T. M. & Mitchell, A. P. The Transcription Factor Rim101p Governs Ion Tolerance and Cell  
775 Differentiation by Direct Repression of the Regulatory Genes NRG1 and SMP1 in *Saccharomyces*  
776 *cerevisiae*. *Mol. Cell. Biol.* **23**, 677–686 (2003).
- 777 73. Ward, M. P., Gimeno, C. J., Fink, G. R. & Garrett, S. SOK2 may regulate cyclic AMP-dependent protein  
778 kinase-stimulated growth and pseudohyphal development by repressing transcription. *Mol. Cell.*  
779 *Biol.* **15**, 6854–6863 (1995).
- 780 74. Carrozza, M. J. *et al.* Stable incorporation of sequence specific repressors Ash1 and Ume6 into the  
781 Rpd3L complex. *Biochim. Biophys. Acta - Gene Struct. Expr.* **1731**, 77–87 (2005).
- 782 75. Yamamoto, N., Maeda, Y., Ikeda, A. & Sakurai, H. Regulation of thermotolerance by stress-induced  
783 transcription factors in *Saccharomyces cerevisiae*. *Eukaryot. Cell* **7**, 783–790 (2008).
- 784 76. Lee, P., Cho, B. R., Joo, H. S. & Hahn, J. S. Yeast Yak1 kinase, a bridge between PKA and stress-

- 785 responsive transcription factors, Hsf1 and Msn2/Msn4. *Mol. Microbiol.* **70**, 882–895 (2008).
- 786 77. Lee, P. *et al.* Rim15-dependent activation of Hsf1 and Msn2/4 transcription factors by direct  
787 phosphorylation in *Saccharomyces cerevisiae*. *FEBS Lett.* **587**, 3648–3655 (2013).
- 788 78. Pedruzzi, I. *et al.* TOR and PKA Signaling Pathways Converge on the Protein Kinase Rim15 to Control  
789 Entry into G0. *Mol. Cell* **12**, 1607–1613 (2003).
- 790 79. Zhang, A. & Gao, W. Mechanisms of protein kinase Sch9 regulating Bcy1 in *Saccharomyces cerevisiae*.  
791 *FEMS Microbiol. Lett.* **331**, 10–16 (2012).
- 792 80. Mudholkar, K., Fitzke, E., Prinz, C., Mayer, M. P. & Rospert, S. The Hsp70 homolog Ssb affects  
793 ribosome biogenesis via the TORC1-Sch9 signaling pathway. *Nat. Commun.* **8**, (2017).
- 794 81. Janschitz, M. *et al.* Novel interconnections of HOG signaling revealed by combined use of two  
795 proteomic software packages. *Cell Commun. Signal.* **17**, (2019).
- 796 82. Dayalan Naidu, S. *et al.* Heat Shock Factor 1 Is a Substrate for p38 Mitogen-Activated Protein Kinases.  
797 *Mol. Cell. Biol.* (2016) doi:10.1128/mcb.00292-16.
- 798 83. Sadowski, I. *et al.* The PhosphoGRID *Saccharomyces cerevisiae* protein phosphorylation site  
799 database: Version 2.0 update. *Database* **2013**, (2013).
- 800 84. Gonçalves, E. *et al.* Systematic Analysis of Transcriptional and Post-transcriptional Regulation of  
801 Metabolism in Yeast. *PLoS Comput. Biol.* **13**, 1–20 (2017).
- 802 85. Birney, E. *et al.* Identification and analysis of functional elements in 1% of the human genome by the  
803 ENCODE pilot project. *Nature* **447**, 799–816 (2007).
- 804 86. Saito, H. & Posas, F. Response to hyperosmotic stress. *Genetics* **192**, 289–318 (2012).
- 805 87. Cox, J. S., Shamu, C. E. & Walter, P. Transcriptional induction of genes encoding endoplasmic  
806 reticulum resident proteins requires a transmembrane protein kinase. *Cell* **73**, 1197–1206 (1993).
- 807 88. Weindling, E. & Bar-Nun, S. Sir2 links the unfolded protein response and the heat shock response in  
808 a stress response network. *Biochem. Biophys. Res. Commun.* **457**, 473–478 (2015).
- 809 89. Travers, K. J. *et al.* Functional and genomic analyses reveal an essential coordination between the  
810 unfolded protein response and ER-associated degradation. *Cell* **101**, 249–258 (2000).
- 811 90. Garreau, H. *et al.* Hyperphosphorylation of Msn2p and Msn4p in response to heat shock and the  
812 diauxic shift is inhibited by cAMP in *Saccharomyces cerevisiae*. *Microbiology* **146**, 2113–2120  
813 (2000).
- 814 91. Görner, W. *et al.* Nuclear localization of the C2H2 zinc finger protein Msn2p is regulated by stress  
815 and protein kinase A activity. *Genes Dev.* **12**, 586–597 (1998).
- 816 92. Smith, A., Ward, M. P. & Garrett, S. Yeast PKA represses Msn2p/Msn4p-dependent gene expression  
817 to regulate growth, stress response and glycogen accumulation. *EMBO J.* **17**, 3556–3564 (1998).
- 818 93. Beach, D., Durkacz, B. & Nurse, P. Functionally homologous cell cycle control genes in budding and  
819 fission yeast. *Nature* **300**, 706–709 (1982).
- 820 94. Rowley, A., Johnston, G. C., Butler, B., Werner-Washburne, M. & Singer, R. A. Heat shock-mediated  
821 cell cycle blockage and G1 cyclin expression in the yeast *Saccharomyces cerevisiae*. *Mol. Cell. Biol.*  
822 **13**, 1034–1041 (1993).
- 823 95. Kao, H. T., Capasso, O., Heintz, N. & Nevins, J. R. Cell cycle control of the human HSP70 gene:  
824 implications for the role of a cellular E1A-like function. *Mol. Cell. Biol.* **5**, 628–633 (1985).

- 825 96. Santos, A., Wernersson, R. & Jensen, L. J. Cyclebase 3.0: A multi-organism database on cell-cycle  
826 regulation and phenotypes. *Nucleic Acids Res.* **43**, D1140–D1144 (2015).
- 827 97. Escoté, X., Zapater, M., Clotet, J. & Posas, F. Hog1 mediates cell-cycle arrest in G1 phase by the dual  
828 targeting of Sic1. *Nat. Cell Biol.* **6**, 997–1002 (2004).
- 829 98. González-Novo, A. *et al.* Hog1 Targets Whi5 and Msa1 Transcription Factors To Downregulate Cyclin  
830 Expression upon Stress. *Mol. Cell. Biol.* **35**, 1606–1618 (2015).
- 831 99. LeBlanc, C. *et al.* Increased efficiency of targeted mutagenesis by CRISPR/Cas9 in plants using heat  
832 stress. *Plant J.* **93**, 377–386 (2018).
- 833 100. Carmel, I., Shomron, N. & Heifetz, Y. Does base-pairing strength play a role in microRNA repression?  
834 *Rna* **18**, 1947–1956 (2012).
- 835 101. Puddu, F. *et al.* Genome architecture and stability in the *Saccharomyces cerevisiae* knockout  
836 collection. *Nature* **573**, 416–420 (2019).
- 837 102. Evers, B. *et al.* CRISPR knockout screening outperforms shRNA and CRISPRi in identifying essential  
838 genes. *Nat. Biotechnol.* **34**, 631–633 (2016).
- 839 103. Sanson, K. R. *et al.* Optimized libraries for CRISPR-Cas9 genetic screens with multiple modalities.  
840 *Nat. Commun.* **9**, (2018).
- 841 104. Banat, I. M., Nigam, P., Singh, D., Marchant, R. & McHale, A. P. Review: Ethanol production at elevated  
842 temperatures and alcohol concentrations: Part I - Yeasts in general. *World Journal of Microbiology  
843 and Biotechnology* vol. 14 809–821 (1998).
- 844 105. Caspeta, L. *et al.* Engineering high-gravity fermentations for ethanol production at elevated  
845 temperature with *Saccharomyces cerevisiae*. *Biotechnol. Bioeng.* **116**, 2587–2597 (2019).

846

#### 847 **Methods References**

- 848 106. Gibson, D. G. *et al.* Enzymatic assembly of DNA molecules up to several hundred kilobases. *Nat.*  
849 *Methods* **6**, 343–345 (2009).
- 850 107. Gietz, R. D. & Schiestl, R. H. Quick and easy yeast transformation using the LiAc/SS carrier DNA/PEG  
851 method. *Nat. Protoc.* **2**, 31–34 (2007).
- 852 108. Gagneur J and Neudecker A, Gagneur, J. & Neudecker, A. cellGrowth: Fitting cell population growth  
853 models. R package version 1.16.0. *R Packag. version* **1**, (2012).
- 854 109. Berthold, M. R. *et al.* KNIME-the Konstanz information miner: version 2.0 and beyond. *AcM SIGKDD  
855 Explor. Newsl.* **11**, 26–31 (2009).
- 856 110. R Core Team. R 3.5.1. A Language and Environment for Statistical Computing. *R Foundation for  
857 Statistical Computing* vol. 2 <https://www.R-project.org> (2018).
- 858 111. Soste, M. *et al.* A sentinel protein assay for simultaneously quantifying cellular processes. *Nat.*  
859 *Methods* **11**, 1045–1048 (2014).
- 860 112. Huh, W. K. *et al.* Global analysis of protein localization in budding yeast. *Nature* **425**, 686–691  
861 (2003).
- 862 113. Brachmann, C. B. *et al.* Designer deletion strains derived from *Saccharomyces cerevisiae* S288C: A  
863 useful set of strains and plasmids for PCR-mediated gene disruption and other applications. *Yeast*

- 864 (1998) doi:10.1002/(SICI)1097-0061(19980130)14:2<115::AID-YEA204>3.0.CO;2-2.
- 865 114. Sorger, P. K. Yeast heat shock factor contains separable transient and sustained response  
866 transcriptional activators. *Cell* **62**, 793–805 (1990).
- 867 115. Pelechano, V., Wei, W. & Steinmetz, L. M. Extensive transcriptional heterogeneity revealed by  
868 isoform profiling. *Nature* **497**, 127–131 (2013).
- 869 116. Schep, A. N. *et al.* Structured nucleosome fingerprints enable high-resolution mapping of chromatin  
870 architecture within regulatory regions. *Genome Res.* **25**, 1757–1770 (2015).
- 871 117. Heigwer, F., Kerr, G. & Boutros, M. E-CRISP: Fast CRISPR target site identification. *Nature Methods*  
872 vol. 11 122–123 (2014).
- 873 118. Robinson, M. D., McCarthy, D. J. & Smyth, G. K. edgeR: A Bioconductor package for differential  
874 expression analysis of digital gene expression data. *Bioinformatics* **26**, 139–140 (2009).
- 875 119. Reimand, J. *et al.* g:Profiler—a web server for functional interpretation of gene lists (2016 update).  
876 *Nucleic Acids Res.* **44**, W83–W89 (2016).
- 877 120. Kolberg, L., Raudvere, U., Kuzmin, I., Vilo, J. & Peterson, H. gprofiler2 -- an R package for gene list  
878 functional enrichment analysis and namespace conversion toolset g:Profiler. *F1000Research* **9**, 709  
879 (2020).
- 880 121. Wickham, H. tidyverse: Easily Install and Load the ‘Tidyverse’. *Bioinformatics* (2011).
- 881 122. R Core Team. Package ‘dplyr’ - A Grammar of Data Manipulation. *CRAN Repository* (2019).
- 882 123. B. Schwalb, A. Tresch, and R. F. LSD: Lots of Superior Depictions. *Compr. R Arch. Netw.* **3**, (2011).
- 883 124. Ginestet, C. ggplot2: Elegant Graphics for Data Analysis. *J. R. Stat. Soc. Ser. A (Statistics Soc.)* **174**, 245–  
884 246 (2011).
- 885 125. Schloerke, B. *et al.* GGally: Extension to ‘ggplot2’. R package version 2.0.0. [https://CRAN.R-](https://CRAN.R-project.org/package=GGally)  
886 [project.org/package=GGally](https://CRAN.R-project.org/package=GGally) (2020).
- 887 126. Lorenz, R. *et al.* ViennaRNA Package 2.0. *Algorithms Mol. Biol.* **6**, (2011).
- 888 127. Bastian, M., Heymann, S. & Jacomy, M. Gephi: An Open Source Software for Exploring and  
889 Manipulating Networks. *Third Int. AAAI Conf. Weblogs Soc. Media* (2009).
- 890 128. Snel, B., Lehmann, G., Bork, P. & Huynen, M. A. String: A web-server to retrieve and display the  
891 repeatedly occurring neighbourhood of a gene. *Nucleic Acids Res.* **28**, 3442–3444 (2000).
- 892 129. Kassambara, A. Package ‘ggpubr’. [https://rpkgs.datanovia.com/ggpubr/](https://rpkgs.datanovia.com/ggpubr/BugReports) *BugReports* (2020).
- 893 130. Baryshnikova, A. *et al.* Quantitative analysis of fitness and genetic interactions in yeast on a genome  
894 scale. *Nat. Methods* (2010).
- 895 131. Breslow, D. K. *et al.* A comprehensive strategy enabling high-resolution functional analysis of the  
896 yeast genome. *Nat. Methods* (2008).
- 897 132. Deutschbauer, A. M. *et al.* Mechanisms of haploinsufficiency revealed by genome-wide profiling in  
898 yeast. *Genetics* (2005).
- 899 133. Gu, Z. *et al.* Role of duplicate genes in genetic robustness against null mutations. *Nature* (2003).
- 900 134. Qian, W., Ma, D., Xiao, C., Wang, Z. & Zhang, J. The Genomic Landscape and Evolutionary Resolution  
901 of Antagonistic Pleiotropy in Yeast. *Cell Rep.* (2012).
- 902 135. Jarzab, A. *et al.* Meltome atlas—thermal proteome stability across the tree of life. *Nat. Methods* **17**,  
903 495–503 (2020).

- 904 136. Guarente, L. & Mason, T. Heme regulates transcription of the *CYC1* gene of *S. cerevisiae* via an  
905 upstream activation site. *Cell* **32**, 1279–1286 (1983).
- 906 137. Sorger, P. K. & Pelham, H. R. Purification and characterization of a heat-shock element binding  
907 protein from yeast. *EMBO J.* **6**, 3035–3041 (1987).
- 908 138. Brachmann, C. B. *et al.* Designer deletion strains derived from *Saccharomyces cerevisiae* S288C: A  
909 useful set of strains and plasmids for PCR-mediated gene disruption and other applications. *Yeast*  
910 (1998).
- 911 139. Jimeno-González, S., Gómez-Herreros, F., Alepuz, P. M. & Chávez, S. A Gene-Specific Requirement for  
912 FACT during Transcription Is Related to the Chromatin Organization of the Transcribed Region. *Mol.*  
913 *Cell. Biol.* **26**, 8710–8721 (2006).
